Brinkmann et. al

# 1 Aryl hydrocarbon receptor-dependent and -independent pathways 2 mediate curcumin anti-aging effects

3

4 Vanessa Brinkmann<sup>1,2,^,#</sup>, Margherita Romeo<sup>1,2,#</sup>, Lucie Larigot<sup>3</sup>, Anne Hemmers<sup>2</sup>, Lisa  
5 Tschage<sup>2</sup>, Jennifer Kleinjohann<sup>2</sup>, Alfonso Schiavi<sup>1,2</sup>, Swantje Steinwachs<sup>2</sup>, Charlotte Esser<sup>2</sup>,  
6 Ralph Menzel<sup>4</sup>, Sara Giani Tagliabue<sup>5</sup>, Laura Bonati<sup>5</sup>, Fiona Cox<sup>1,6</sup>, Niloofar Ale-Agha<sup>1</sup>, Philipp  
7 Jakobs<sup>1</sup>, Joachim Altschmied<sup>1,2</sup>, Judith Haendeler<sup>1</sup>, Xavier Coumoul<sup>3</sup>, Natascia Ventura<sup>1,2,\*</sup>

8 1. Institute of Clinical Chemistry and Laboratory Diagnostic, Medical Faculty, Heinrich Heine  
9 University, Düsseldorf, Moorenstr 5, 40225 Düsseldorf, Germany

10 2. Leibniz Institute for Environmental Medicine (IUF), Auf'm Hennekamp 50, 40225 Düsseldorf,  
11 Germany

12 3. Faculté des Sciences Fondamentales et Biomédicales, Université de Paris, 45 rue des Saints-  
13 Pères, F-75006, Paris, France

14 4. Institute of Biology, Humboldt-University Berlin, Philippstr. 13, 10115 Berlin, Germany

15 5. Department of Earth and Environmental Sciences, University of Milano-Bicocca, Piazza della  
16 Scienza 1, 20126 Milano, Italy

17 6. Institute of Clinical Pharmacology and Pharmacology, Medical Faculty, University Hospital and  
18 Heinrich Heine University, Düsseldorf, Moorenstr 5, 40225 Düsseldorf, Germany

19

20 Lead contact: Natascia Ventura [natascia.ventura@uni-duesseldorf.de](mailto:natascia.ventura@uni-duesseldorf.de),

21 ^ Current address: Institute of Toxicology, Medical Faculty, Heinrich Heine University,  
22 Düsseldorf, Moorenstr 5, 40225 Düsseldorf, Germany

23 # Equally contributed to the paper

24

25 \* Correspondence: [natascia.ventura@uni-duesseldorf.de](mailto:natascia.ventura@uni-duesseldorf.de), 0049-211-3389203

26

## 27 Graphical Abstract

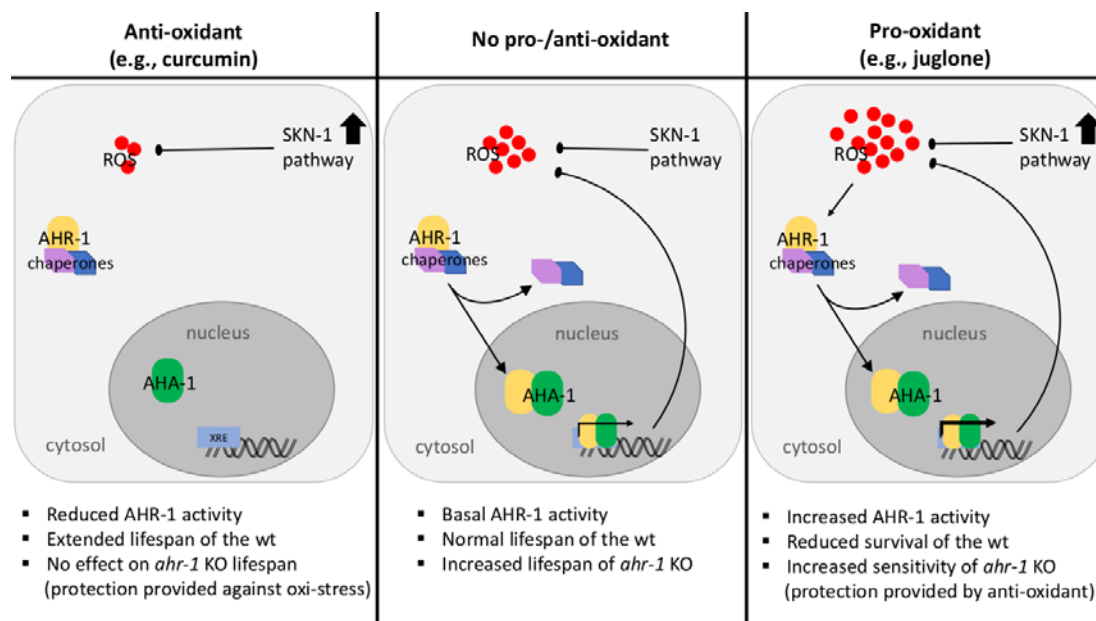

28

Brinkmann et. al

## 29 Abstract

30 The aryl hydrocarbon receptor (AhR) is a ligand-activated transcription factor whose activity  
31 can be modulated by polyphenols such as curcumin. AhR and curcumin have evolutionarily  
32 conserved effects on aging. Here, we investigated whether and how the AhR mediates the  
33 anti-aging effects of curcumin across species. Using a combination of *in vivo*, *in vitro*, and *in*  
34 *silico* analyses, we demonstrated that curcumin has AhR-dependent or -independent effects  
35 in a context-specific manner. We found that in *Caenorhabditis elegans*, AhR mediates  
36 curcumin-induced lifespan extension, most likely through a ligand-independent inhibitory  
37 mechanism related to its antioxidant activity. Curcumin also showed AhR-independent anti-  
38 aging activities such as protection against aggregation-prone proteins and oxidative stress in  
39 *C. elegans* and promotion of the migratory capacity of human primary endothelial cells.  
40 These AhR-independent effects are largely mediated by the Nrf2/SKN-1 pathway.

41

42 **Keywords:** Aryl hydrocarbon Receptor, curcumin, oxidative stress, *Caenorhabditis elegans*,  
43 mice, endothelial cells, *in vivo*, *in vitro*, *in silico*

Brinkmann et. al

## 44 **Introduction**

45 The aryl hydrocarbon receptor (AhR) is a ubiquitous ligand-activated transcription factor  
46 identified as a determinant for the toxicological response to 2,3,7,8-tetrachlorodibenzo-p-dioxin  
47 (TCDD) in mammals (Poland et al., 1976). AhR signaling pathways have been well described  
48 in mammalian cells. Briefly, unliganded AhR is localized in the cytoplasm and stabilized by  
49 diverse co-factors, such as 90-kDa heat shock protein (Hsp90), the AHR-interacting protein  
50 (AIP), and the chaperone p23. Binding to exogenous (e.g. TCDD) or endogenous (e.g.  
51 kynurenine) ligands, promotes the translocation of this complex into the nucleus where AhR  
52 dissociates from its co-factors and assembles in a heterodimer with the AHR nuclear  
53 translocator (ARNT). The resulting AHR/ARNT complex binds to the xenobiotic responsive  
54 elements (XREs) of a battery of responsive phase I and II detoxification genes, eventually  
55 leading to the ligands' degradation (Abel and Haarmann-Stemmann, 2010). Apart from its role  
56 in xenobiotic response, functions for the AhR in a variety of pathophysiological processes  
57 ranging from immunity (Gutierrez-Vazquez and Quintana, 2018, Zhang et al., 2010),  
58 inflammation (Vondracek et al., 2011, Hanieh, 2014), lipid and glucose metabolism (Minami et  
59 al., 2008, Diani-Moore et al., 2010) to cardiovascular, liver and other organs' diseases (Yi et  
60 al., 2018, Schmidt et al., 1996, Fernandez-Salguero et al., 1995, Fernandez-Salguero et al.,  
61 1997) have been discovered in the last decades. Growing evidence also points to disparate  
62 and seemly contradictory roles of AhR in the aging process, which could nonetheless be  
63 reconciled taking into account tissue-, dose- and species-specific effects (Brinkmann et al.,  
64 2020a). A negative role for AhR in aging and age-associated features has been described  
65 across species (Eckers et al., 2016, Williams et al., 2014). Compared to the wild-type  
66 *Caenorhabditis elegans* the AhR mutant strain, *ahr-1(ju145)*, has an extended life- and health-  
67 span; in mice, AhR deficiency improves vessel function and increases activity of the nitric oxide  
68 synthase and therefore, the NO bioavailability; and, finally, a positive correlation was found  
69 between AhR expression and vessel stiffness middle-aged and aged human subjects (Eckers  
70 et al., 2016). Furthermore, in an epidemiological study on a Chinese population AhR  
71 expression was related to the incidence of coronary arterial disease (Huang et al., 2015).

Brinkmann et. al

72 Of note, many compounds impacting aging or age-related diseases (Sakakibara et al., 2005,  
73 Okey et al., 1984, Gao et al., 2015) can modulate AhR activity (Denison et al., 2002, Ashida  
74 et al., 2000, Zhang et al., 2003). While activation of AhR by xenobiotics leads to different  
75 cancers in mammals (Mandal, 2005, Marinkovic et al., 2010), dietary and environmental  
76 factors were shown to have opposite AhR-dependent effects on *C. elegans*' health-span  
77 (Brinkmann et al., 2020b). Among the dietary AhR modulators, polyphenols such as curcumin  
78 have been largely studied for their pro-health effects. Curcumin, is a yellow pigment from  
79 *Curcuma longa*, with numerous evolutionarily conserved beneficial properties, including  
80 antioxidant, anti-inflammatory and anti-aging activities (Aggarwal and Harikumar, 2009).  
81 Curcumin prevents protein aggregation and increases longevity in *C. elegans* and *Drosophila*  
82 via modulation of protein homeostasis (Alavez et al., 2011, Liu et al., 2014, Caesar et al.,  
83 2012). Moreover, when administered to an Alzheimer's Disease transgenic mouse model, it  
84 significantly reduced the total amyloid-beta ( $A\beta$ ) burden (Lim et al., 2001). In old mice,  
85 curcumin restored NO-bioavailability thus reducing oxidative stress and improving endothelial  
86 dysfunction and artery stiffness assessed by aortic pulse wave velocity (PWV) - one of the  
87 most important clinical measurements or markers of large elastic artery stiffness (Fleenor et  
88 al., 2013). Several studies in humans also showed a protective effect of curcumin on  
89 cardiovascular health (Oliver et al., 2016). However, the mode of action of curcumin is still  
90 largely unclear, and, more importantly, whether its beneficial health effects are mediated by  
91 AhR has not been investigated (Xue et al., 2017, Jeuken et al., 2003).

92 Model organisms such as the nematode *C. elegans* have been instrumental to identify genetic  
93 and environmental determinants of aging. This is due to its many advantageous properties,  
94 including its easy laboratory handling, short lifespan, and the production of a large number of  
95 progeny by self-fertilization. *C. elegans*' genome is completely sequenced and most of its  
96 genes and pathways are evolutionarily conserved. The protein sequence of AhR is conserved  
97 during the evolution and in *C. elegans* the orthologs of AhR and ARNT are encoded by the  
98 AhR-related (*ahr-1*) and *ahr-1* associated (*aha-1*) genes, respectively (Powell-Coffman et al.,  
99 1998). The corresponding proteins, AHR-1 and AHA-1, share about 40% of sequence identity

Brinkmann et. al

100 with the mammalian ones and form a heterodimer (also with the mammalian counterparts)  
101 which can bind XREs of the target genes *in vitro* (Bell and Poland, 2000). AHR-1 is mostly  
102 expressed in neuronal cell types such as GABAergic neurons (Huang et al., 2004) and it plays  
103 a key role in controlling neuronal development (Qin and Powell-Coffman, 2004). Unlike  
104 vertebrates AhR, AHR-1 does not bind TCDD and other related xenobiotics (Powell-Coffman  
105 et al., 1998, Butler et al., 2001), yet it shares with mammalian AhR common features in the  
106 regulation of neuronal processes, development and fertility (Qin and Powell-Coffman, 2004,  
107 Qin et al., 2006, Huang et al., 2004, Smith et al., 2013, Baba et al., 2008, Aarnio et al., 2010)  
108 ultimately suggesting that the ancestral AhR was not directly involved in controlling genes for  
109 degradation of toxic ligands (Hahn et al., 1997, Hahn, 2002). We thus reckoned *C. elegans* a  
110 unique and powerful model system to identify and study ancestral functions of the AhR possibly  
111 unrelated to its xenobiotics response.

112 In this study, we investigated the role of AhR in curcumin anti-aging effects across species.  
113 Through a combination of *in vivo*, *in vitro*, and *in silico* analyses we found that curcumin  
114 displays different beneficial anti-aging effects through uncoupled *ahr-1*-dependent  
115 and -independent mechanisms. We found that *C. elegans ahr-1*-depleted animals are long-  
116 lived but more sensitive to oxidative stress. While curcumin did not further extend the lifespan  
117 of the *C. elegans ahr-1* mutants it promoted their resistance to oxidative stress. Curcumin also  
118 promoted antioxidant response and migratory capacity of human primary endothelial cells (EC)  
119 independently of AhR, an effect that primarily relied on Nrf2/SKN-1 across species. Coupling  
120 results from a cellular reporter assay and *in-silico* modeling of the AHR-1 ligand-binding  
121 domain (LBD), we then showed that curcumin most likely suppressed AHR-1 activity in a  
122 ligand-binding-independent manner. Notably, and in line with the data in *C. elegans* and EC,  
123 curcumin and pro-oxidants displayed opposite effects on AHR-1 activity, implying curcumin  
124 may modulate AHR-1 activity through its anti-oxidant capacity either directly or indirectly via  
125 regulation of Nrf2/SKN-1 or other redox regulatory proteins.

## 126 Results

### 127 **Curcumin promotes healthspan in an AhR-dependent and -independent manner**

128 Loss of *ahr-1* promotes *C. elegans*' health- and lifespan in basal conditions (Eckers et al.,  
129 2016) and it negatively impacts age-related traits in response to mammalian AhR modulators  
130 like benzo[a]pyrene (BaP), UVB light, and microbiota (Brinkmann et al., 2020b). Dietary  
131 polyphenols, such as curcumin, form an important group of mammals' AhR modulators with  
132 pro-longevity effects in *C. elegans* (Liao et al., 2011, Nishiumi et al., 2007) and we thus  
133 investigated the lifespan-extending effect of curcumin for its *ahr-1* dependency. Curcumin  
134 reproducibly and significantly extended the life- and health-span of *C. elegans* in an *ahr-1*-  
135 dependent manner (**Fig 1A, B**). Previously, we have shown that loss of *ahr-1* also extends the  
136 lifespan in Huntington's disease and Parkinson's disease models, with muscle-overexpression  
137 of aggregation-prone polyglutamine (polyQ40) and  $\alpha$ -synuclein ( $\alpha$ -syn) respectively, while at  
138 the same time increasing their content of protein aggregates (Brinkmann et al., 2020b).  
139 Interestingly, curcumin treatment increased the number of polyQ40 and  $\alpha$ -syn aggregates to  
140 the same extent as *ahr-1* loss of function (**Fig 1C**). Curcumin also promoted lifespan and  
141 locomotory ability in these disease models (**Fig 1D, E**) but the effects of *ahr-1* loss and  
142 curcumin supplementation were additive in the PolyQ background (**Fig 1D**), revealing AHR-1-  
143 independent protective functions of curcumin at least in this compromised background.

Brinkmann et. al

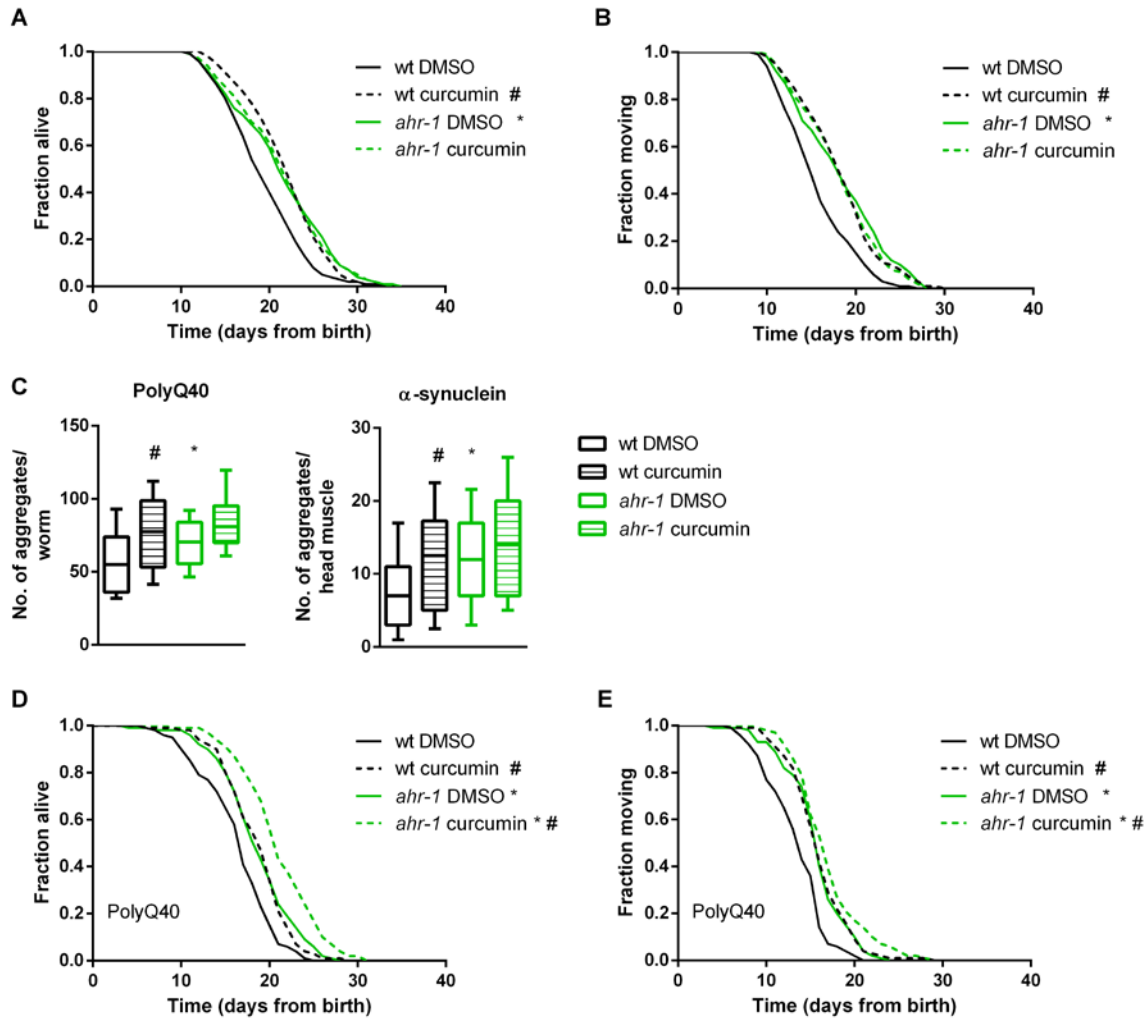

144

145 **Figure 1. Curcumin promotes health in an AHR-1-dependent and -independent manner.**

146 Lifespan (A) and health-span (B) curves of DMSO- or curcumin-treated wt and *ahr-1* nematodes.  
147 Survival curves show pooled data of 290-300 worms/condition in 5 experiments. Statistical test: Log-  
148 Rank test, #significance vs. DMSO, \*significance vs. wt, Bonferroni p-value < 0.05. C) Quantification of  
149 aggregates in 10-days old polyQ;wt and polyQ;*ahr-1* (left panel) or 7-days old asyn;wt and asyn;*ahr-1*  
150 (right panel). Boxplots show pooled data from 59-111 worms/condition in 3 experiments. Statistical test:  
151 1-way ANOVA with Tukey's multiple comparisons test, \*p-value < 0.05 vs. wt, #p-value < 0.05 vs.  
152 DMSO. D-E) Life-/healthspan of polyQ;wt and polyQ;*ahr-1*. Survival curves show pooled data of 180  
153 worms/condition in 3 experiments. Statistical test: Log-Rank test, #significance vs. DMSO, \*significance  
154 vs. wt, Bonferroni p-value < 0.05.

155

156 ***ugt-45* mediates the anti-aging effects of curcumin and *ahr-1* depletion**

157 In search of possible downstream *ahr-1*-dependent effectors of curcumin, we took targeted  
158 and unbiased approaches. We examined the expression of classical mammalian AhR target  
159 genes and focused on the *Cyp* genes since curcumin alters *Cyp1A1* and *Cyp1B1* expression



Brinkmann et. al

160 in mammalian cells (Rinaldi et al., 2002, Choi et al., 2008). However, the quantification of 47  
161 different *cyps* in *C. elegans* by semi-quantitative Real-time PCR (qPCR) revealed that only  
162 *cyp-13B1* was significantly up-regulated either by *ahr-1* depletion or by curcumin in an *ahr-1*-  
163 dependent manner (**Fig S1A-B**), while three other *cyps* (i.e. *cyp-13A5* and *cyp-13A8*, *cyp*-  
164 *42A1*) were increased by curcumin only in the absence of *ahr-1* (**Fig S1**). These data, along  
165 with other works (Brinkmann et al., 2020b, Jones et al., 2013), suggest that *cyps* are likely not  
166 the major targets of *CeAhR*. This is also supported by our transcriptomic analysis in wild-type  
167 and *ahr-1* mutants. Indeed, consistent with the role of AHR-1 in neuronal determination (Huang  
168 et al., 2004, Qin and Powell-Coffman, 2004, Smith et al., 2013, Qin et al., 2006), the gene  
169 expression changes between wild-type and *ahr-1* mutants showed enrichment in processes  
170 linked to neuronal development and differentiation and no major changes in classical  
171 detoxification genes (**Fig 2A**). qPCR analysis of some of the most up- and down-regulated  
172 genes between *ahr-1(ju145)* and wild-type (*atf-2*, *K04H4.2*, *egl-46*, *T20F5.4*, *ptr-4*, *dyf-7*, *clec*-  
173 *209*, *C01B4.6*, *C01B4.7*, *F56A4.3*) mostly confirmed their *ahr-1*-dependency in basal  
174 conditions (**Fig 2B**) but neither UVB (Brinkmann et al., 2020b) nor curcumin (**Fig 2C**)  
175 significantly affected the expression of these genes. We wondered whether the expression  
176 changes in these genes are evolutionarily conserved and assessed their expression in different  
177 tissues (i.e. brain, liver, gut, and blood) of 8- and 18-months-old wild-type and AhR KO mice.  
178 Some genes showed a tendency for an increased expression in young (*atf-2* homolog) or old  
179 (*lpr-4/5* homologs) mice in a tissue-specific manner, but neither obvious pattern nor conserved  
180 changes were observed (**Fig S2**). These results reflect possible species-specific differences  
181 or tissue-dependent AhR transcriptional activity in mammals overlooked by whole-animal  
182 transcriptomic analysis in *C. elegans*.



Brinkmann et. al

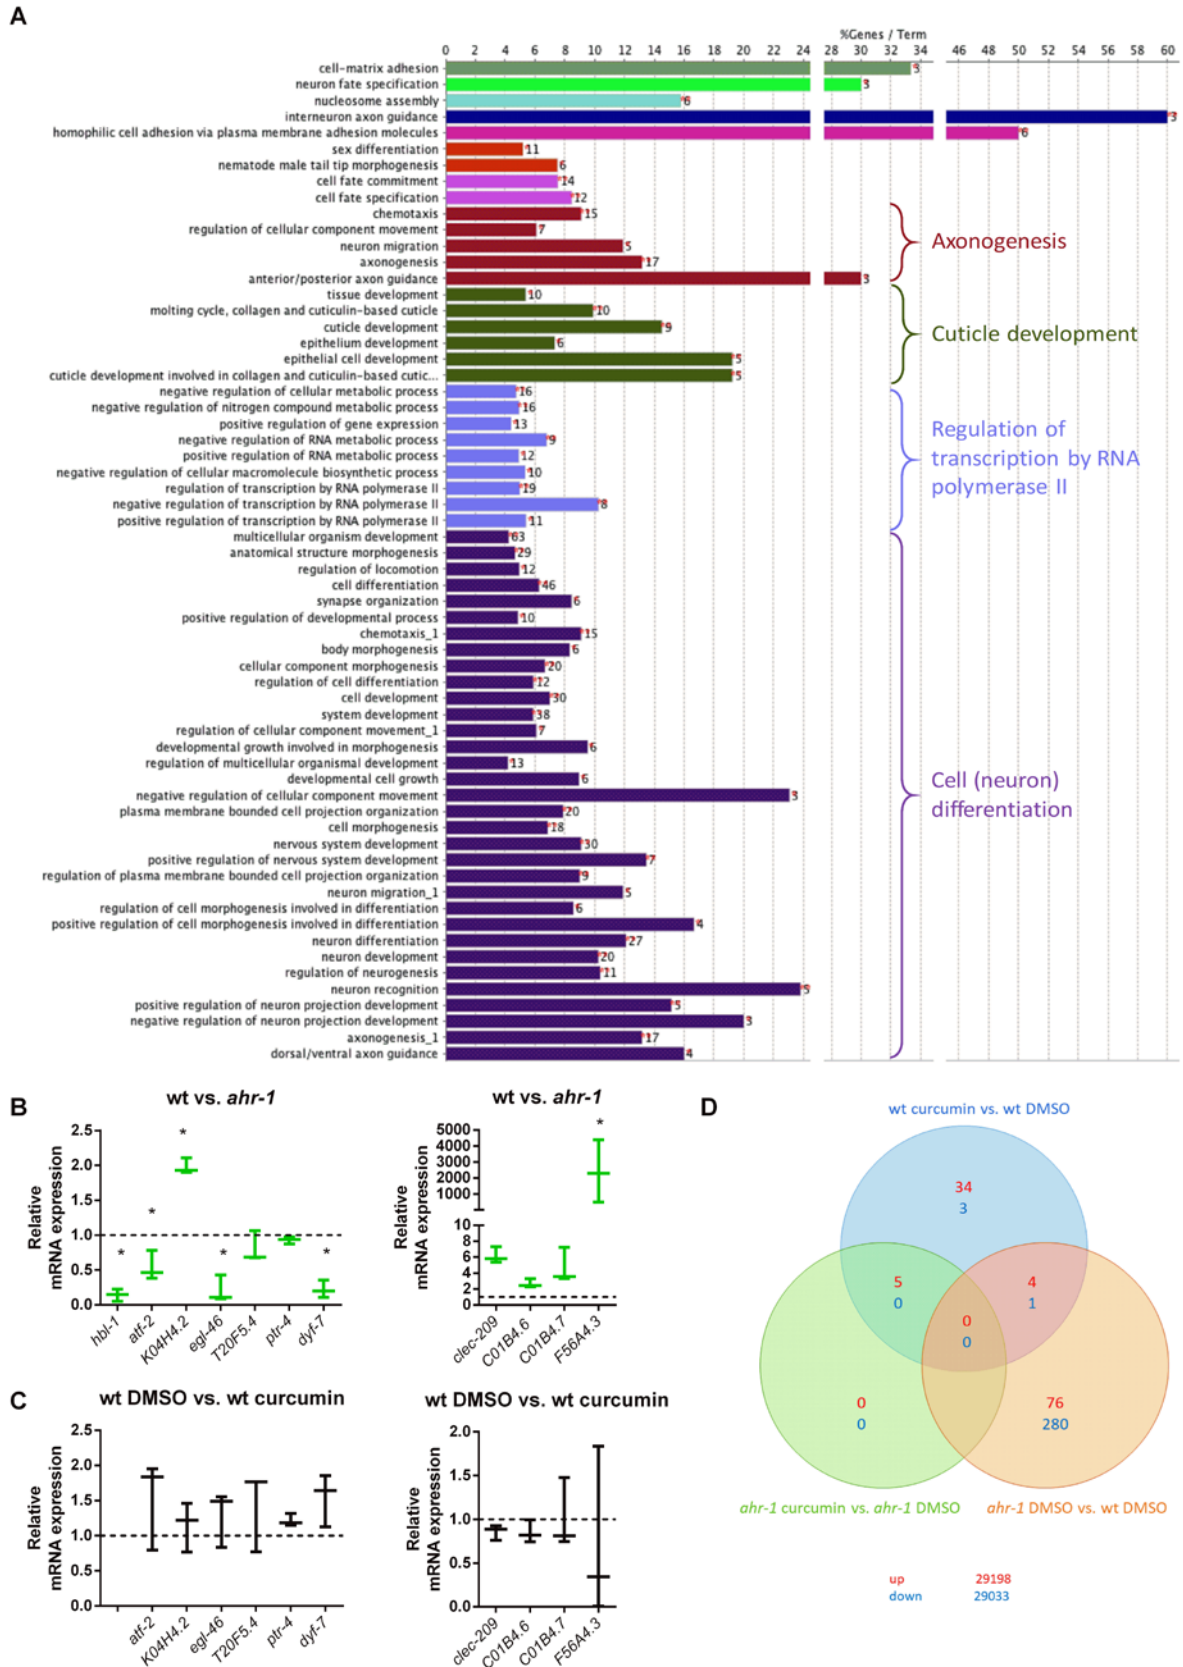

183

184 **Figure 2. Genes differentially regulated by curcumin are primarily regulated in an *ahr-1*-**  
 185 **dependent manner.**

186 **A)** Gene Ontology (GO) enrichment for biological processes after GO term fusion in *ahr-1* vs. wt. **B-C)**  
 187 The expression of the strongest down- and up-regulated genes between wt and *ahr-1* (Brinkmann et  
 188 al., 2020b) was assessed by qPCR in wt vs. *ahr-1* (B) and DMSO- vs. curcumin-treated nematodes

Brinkmann et. al

189 (C). Boxplots show data of 3 experiments. The expression is shown relative to DMSO-treated wt  
190 (dashed line). Statistical test: 1-way ANOVA with Tukey's multiple comparisons test, \*p-value < 0.05  
191 vs. wt, #p-value < 0.05 vs. DMSO. **D)** Venn diagram of differentially expressed genes on the  
192 microarray. The number of genes that were differentially up- or down-regulated between the indicated  
193 conditions is shown in red and blue, respectively. The numbers in the interchanges refer to the genes  
194 that occurred in both comparisons. The values in the lower right corner show the number of genes on  
195 the array that were not differentially expressed.

196

197 A thorough examination of the most differentially expressed genes between *C. elegans* wild-  
198 type and *ahr-1(ju145)* revealed that the expression of many of these genes is affected in  
199 *C. elegans* during aging and by dietary mammalian AhR modulators (e.g. quercetin,  
200 resveratrol) (Brinkmann et al., 2020b), thus suggesting a role for AHR-1 in polyphenol-  
201 modulated gene expression. In line with this scenario, the microarray data showed that most  
202 of the genes differentially expressed upon curcumin treatment were indeed regulated in an  
203 *ahr-1*-dependent manner (**Fig 2D; Table 1**). Out of 47 genes altered by curcumin in the wild-  
204 type (43 up- and 4 down-regulated), only 5 were also induced by curcumin in *ahr-1(ju145)*.  
205 Among the genes regulated by curcumin in an AHR-1-dependent manner were phase II  
206 enzymes and interestingly, some of them (*ugt-9* and *ugt-29*), were regulated in the same  
207 direction by curcumin or by loss of *ahr-1* (**Table 1**). Thus, we checked their expression and  
208 that of additional *ugts* (*ugt-45* and *ugt-57*) that were differentially expressed when applying a  
209 less restrictive statistical analysis not corrected for multiple comparisons. Of the examined  
210 genes *ugt-45* was increased in *ahr-1(ju145)* and by curcumin treatment (**Fig 3A, B**). We also  
211 observed changes in the expression of some detoxification genes between wild-type and AhR  
212 KO mice, in a tissue-dependent manner. The differential expression of those genes was  
213 highest in the brain, where *Ugt2a3* (*ugt-9* and *ugt-29* in *C. elegans*) was down- and *Hpgds*  
214 (*gst-4* in *C. elegans*) was up-regulated (**Fig S3A**). There was no change in the expression of  
215 any of the tested genes in the liver samples of mice (**Fig S3B**). In line with the *C. elegans* data,  
216 the *ugt-45* murine homolog *Ugt3a2* showed a tendency towards overexpression in the  
217 intestines of Ahr KO mice (**Fig S3C**). Notably, *ugt-45* RNAi prevented the beneficial effects on  
218 life- and health-span promoted by curcumin (**Fig 3C, D**) or *ahr-1* depletion (**Fig 3E, F**) indicating

Brinkmann et. al

219 the two interventions may rely on jointly modulated downstream signaling to elicit their anti-  
 220 aging activity.

221 **Table 1.** List of genes from the microarray analysis.

| <b>Strongest over-/under-expressed genes by curcumin in an <i>ahr-1</i>-dependent manner</b> |                                    |                                                                             |                          |                                 |                                                                                                                                     |
|----------------------------------------------------------------------------------------------|------------------------------------|-----------------------------------------------------------------------------|--------------------------|---------------------------------|-------------------------------------------------------------------------------------------------------------------------------------|
| <b>Gene/ Sequence name</b>                                                                   | <b>Gene class<sup>a</sup></b>      | <b>Molecular function<sup>a</sup></b>                                       | <b>logFC<sup>b</sup></b> | <b>adj. P-value<sup>c</sup></b> | <b>Selected modulators<sup>a</sup></b>                                                                                              |
| <b>H43E16.1</b>                                                                              | unknown                            | unknown                                                                     | 1.53                     | 0.021                           | bacterial infection, quercetin, rotenone, aging, <i>nuo-6(qm200)</i>                                                                |
| <b>numr-1</b>                                                                                | Nuclear localized metal responsive | unknown                                                                     | 1.42                     | 0.034                           | bacterial infection, quercetin, <i>spg-7</i> RNAi, <i>isp-1(qm150)</i> , <i>nuo-6(qm200)</i> , aging                                |
| <b>mul-1</b>                                                                                 | Mucin-like                         | unknown                                                                     | 1.34                     | 0.029                           | resveratrol, bacterial infection, <i>spg-7</i> RNAi, rotenone, paraquat, indole, <i>isp-1(qm150)</i> , <i>nuo-6(qm200)</i>          |
| <b>oac-14</b>                                                                                | O-acyltransferase homolog          | transferase activity, transferring acyl groups other than amino-acyl groups | 1.24                     | 0.085                           | bacterial infection, quercetin, tryptophan, rotenone, paraquat, indole, <i>nuo-6(qm200)</i>                                         |
| <b>F58B4.5</b>                                                                               | unknown                            | unknown                                                                     | 1.21                     | 0.030                           | resveratrol, quercetin, <i>spg-7</i> RNAi, tryptophan, <i>isp-1(qm150)</i> , <i>nuo-6(qm200)</i> , paraquat, indole,                |
| <b>comt-4</b>                                                                                | Catechol-O-methyltransferase       | O-methyltransferase activity                                                | 1.17                     | 0.030                           | pathogenic bacteria, <i>ahr-1(ju145)</i> , quercetin, rotenone, paraquat, <i>isp-1(qm150)</i> , <i>nuo-6(qm200)</i> , indole, aging |
| <b>F09C8.1</b>                                                                               | Ortholog of human                  | Phospholipase activity;                                                     | 1.08                     | 0.030                           | <i>ahr-1(ju145)</i> , bacterial infection,                                                                                          |

Brinkmann et. al

|                                                                              | phospholipase B1              | hydrolase activity, acting on ester bonds                                                                                                              |                          |                          | quercetin, rotenone, paraquat, <i>isp-1(qm150)</i> , <i>nuo-6(qm200)</i> , aging                                   |
|------------------------------------------------------------------------------|-------------------------------|--------------------------------------------------------------------------------------------------------------------------------------------------------|--------------------------|--------------------------|--------------------------------------------------------------------------------------------------------------------|
| <b>ugt-48</b>                                                                | UDP-glucuronosyltransferase   | calmodulin binding, glucuronosyltransferase activity, UDP-glycosyltransferase activity, transferase activity, transferring hexosyl and glycosyl groups | 1.07                     | 0.034                    | bacterial infection, rotenone, aging                                                                               |
| <b>cyp-13A5</b>                                                              | Cytochrome P450               | monooxygenase activity, metal ion binding, heme binding, oxidoreductase activity                                                                       | 1.05                     | 0.057                    | bacterial infection, quercetin, <i>spg-7</i> RNAi, tryptophan, <i>isp-1(qm150)</i> , <i>nuo-6(qm200)</i> , indole  |
| <b>T19C9.8</b>                                                               | unknown                       | unknown                                                                                                                                                | 0.96                     | 0.084                    | bacterial infection, quercetin, <i>spg-7</i> RNAi, tryptophan, paraquat, <i>isp-1(qm150)</i> , <i>nuo-6(qm200)</i> |
| <b>lys-7</b>                                                                 | Lysozyme                      | unknown                                                                                                                                                | -1.54                    | 0.084                    | bacterial infection, aging, rotenone, <i>isp-1(qm150)</i> , <i>nuo-6(qm200)</i>                                    |
| <b>cyp-35A5</b>                                                              | Cytochrome P450               | monooxygenase activity, metal ion binding, heme binding, oxidoreductase activity, steroid hydroxylase activity                                         | -1.08                    | 0.087                    | bacterial infection, <i>ahr-1(ju145)</i> , aging, tryptophan, rotenone, <i>isp-1(qm150)</i> , <i>nuo-6(qm200)</i>  |
| <b>C14A4.9</b>                                                               | unknown                       | unknown                                                                                                                                                | -0.55                    | 0.079                    | bacterial infection, quercetin, rotenone, indole                                                                   |
| <b>Genes regulated in the same way by curcumin or <i>ahr-1</i> depletion</b> |                               |                                                                                                                                                        |                          |                          |                                                                                                                    |
| <b>Gene/Sequence name</b>                                                    | <b>Gene class<sup>a</sup></b> | <b>Molecular function<sup>a</sup></b>                                                                                                                  | <b>LogFC<sup>d</sup></b> | <b>LogFC<sup>e</sup></b> |                                                                                                                    |
| <b>slc-17.5</b>                                                              | Solute carrier homolog        | transmembrane transporter activity                                                                                                                     | 0.64                     | 0.46                     |                                                                                                                    |
| <b>ugt-9</b>                                                                 | UDP-glucuronosyltransferase   | glucuronosyltransferase activity, transferase activity, transferring hexosyl groups                                                                    | 0.57                     | 0.41                     |                                                                                                                    |
| <b>nhr-239</b>                                                               | Nuclear hormone receptor      | metal ion binding, zinc ion binding, transcription factor activity, sequence-specific DNA binding                                                      | 0.43                     | 0.39                     |                                                                                                                    |

Brinkmann et. al

|                |                              |                                                                                                  |       |       |
|----------------|------------------------------|--------------------------------------------------------------------------------------------------|-------|-------|
| <b>ugt-29</b>  | UDP-glucuronosyl-transferase | glucuronosyltransferase activity, transferase activity, transferring hexosyl and glycosyl groups | 0.36  | 0.34  |
| <b>C14A4.9</b> | unknown                      | unknown                                                                                          | -0.55 | -0.63 |

222 <sup>a</sup>Extracted from Wormbase; <sup>b</sup>LogFC: logarithmic fold change; <sup>c</sup>Adj. p-value: adjusted p-value;  
 223 <sup>d</sup>logarithmic fold change wt curcumin vs. wt DMSO; <sup>e</sup>logarithmic fold change *ahr-1* DMSO vs. wt DMSO.

224

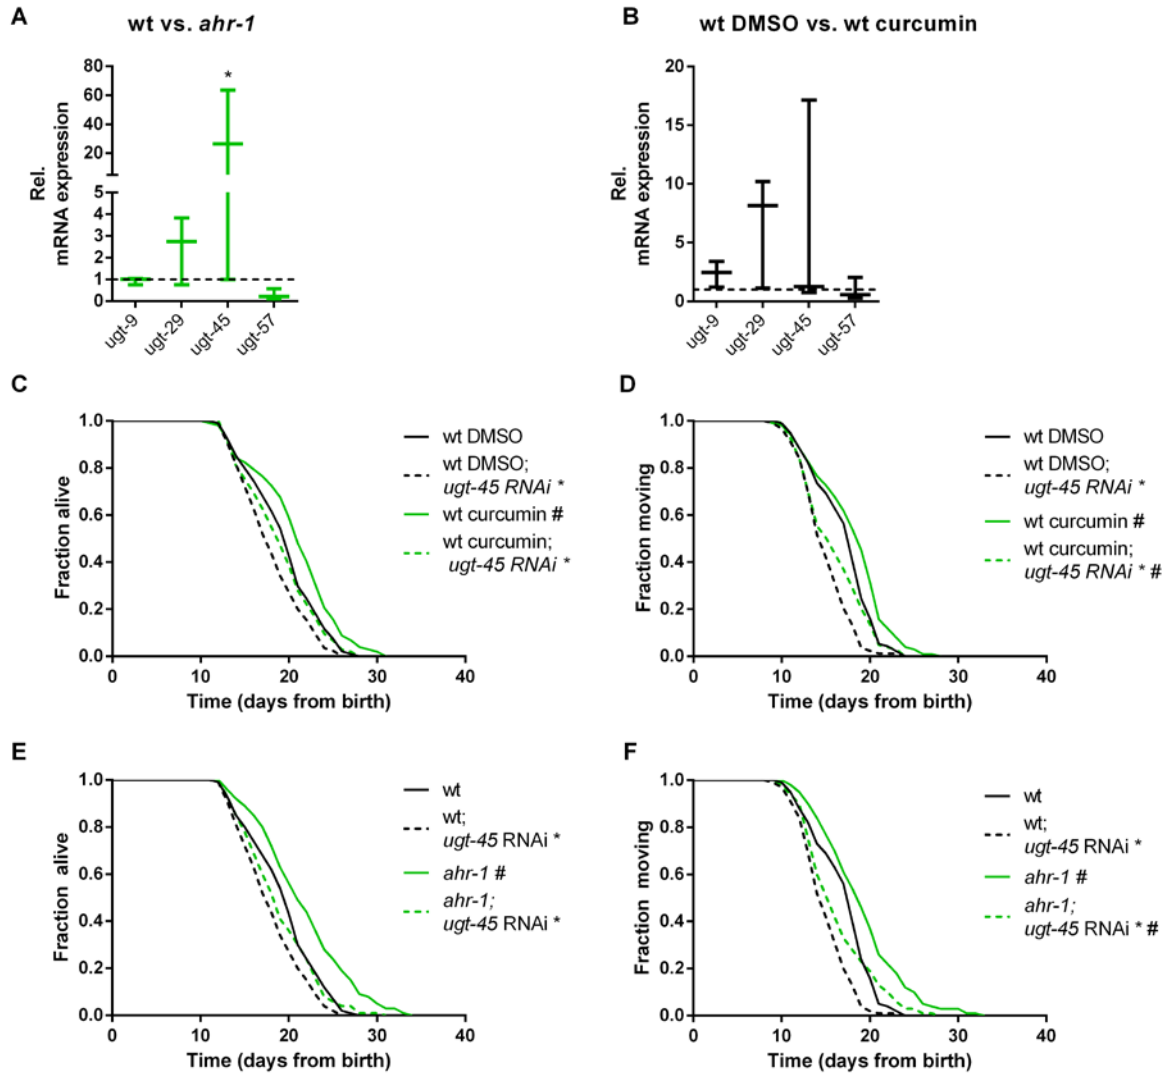

225

226 **Figure 3. *ugt-45* is required for the lifespan extension of curcumin and *ahr-1* mutants.**

227 **A-B**) Gene expression was assessed by qPCR in wt vs. *ahr-1* (**A**) and DMSO- vs. curcumin-treated wt  
 228 nematodes (**B**). Boxplots show data of 3 experiments. The expression is shown relative to DMSO-  
 229 treated wt (indicated as dashed line). Statistical test: 2-Way ANOVA with Sidak's multiple comparisons  
 230 test, \*p-value < 0.05 vs. wt, #p-value < 0.05 vs. DMSO. **C-D**) Effect of *ugt-45* RNAi on curcumin-mediated  
 231 life-/healthspan extension in the wt. Survival curves show pooled data of 120 worms/condition in 2  
 232 replicates. Statistical test: Log-Rank test, #significance vs. DMSO, \*significance vs. control RNAi,  
 233 Bonferroni p-value < 0.05. **E-F**) Effect of *ugt-45* RNAi on *ahr-1*-mediated life-/healthspan extension.  
 234 Survival curves show pooled data of 120 worms/condition in 2 replicates. Statistical test: Log-Rank test,  
 235 #significance vs. wt, \*significance vs. control RNAi, Bonferroni p-value < 0.05.

236

Brinkmann et. al

237

238

239 **AHR-1 and curcumin independently protect against oxidative stress**

240 The beneficial properties of polyphenols are often ascribed to their ability to protect against  
241 reactive oxygen species (ROS) (Bors et al., 1990, Sandoval-Acuna et al., 2014). Since AhR is  
242 involved in oxidative stress-mediated processes (Wang et al., 2019, Kubli et al., 2019, Shi et  
243 al., 2021) we wondered whether curcumin may impact animals' physiology via AhR-regulated  
244 antioxidant responses. We observed that *ahr-1* mutants produce more mitochondrial(mt)ROS  
245 and have a reduced mitochondrial membrane potential (**Fig 4A, B**), two parameters correlating  
246 with longevity (Bazopoulou et al., 2019, Lemire et al., 2009). While consistent with the  
247 mitohormesis paradigm *ahr-1(ju145)* produce slightly more mtROS and live longer, these  
248 animals were more sensitive to oxidative stress than the wild-type. Specifically, the detrimental  
249 effect induced by juglone and H<sub>2</sub>O<sub>2</sub> on animals' pumping, motility and survival was significantly  
250 stronger in *ahr-1(ju145)* compared to wild-type (**Fig 4C-F**). These data suggest that AHR-1  
251 depletion has beneficial mitohormetic effects in basal conditions, while its presence is required  
252 for oxidative stress protection thus uncoupling two often correlating age-related parameters,  
253 namely lifespan and stress resistance. Instead, curcumin significantly improved H<sub>2</sub>O<sub>2</sub> and  
254 juglone resistance in both wild-type and *ahr-1* mutants (**Fig 4E, F**), suggesting that curcumin  
255 elicits an *ahr-1*-independent antioxidant response. Consistent with the uncoupled regulation of  
256 lifespan and oxidative stress resistance, *ugt-45* silencing did not affect sensitivity to oxidative  
257 stress either of *ahr-1* mutants or curcumin-treated animals (**Fig 4G**). Thus, curcumin has pro-  
258 longevity effects via *ahr-1* and *ugt-45* but protects against oxidative stress through *ahr-1*-  
259 independent mechanisms.



Brinkmann et. al

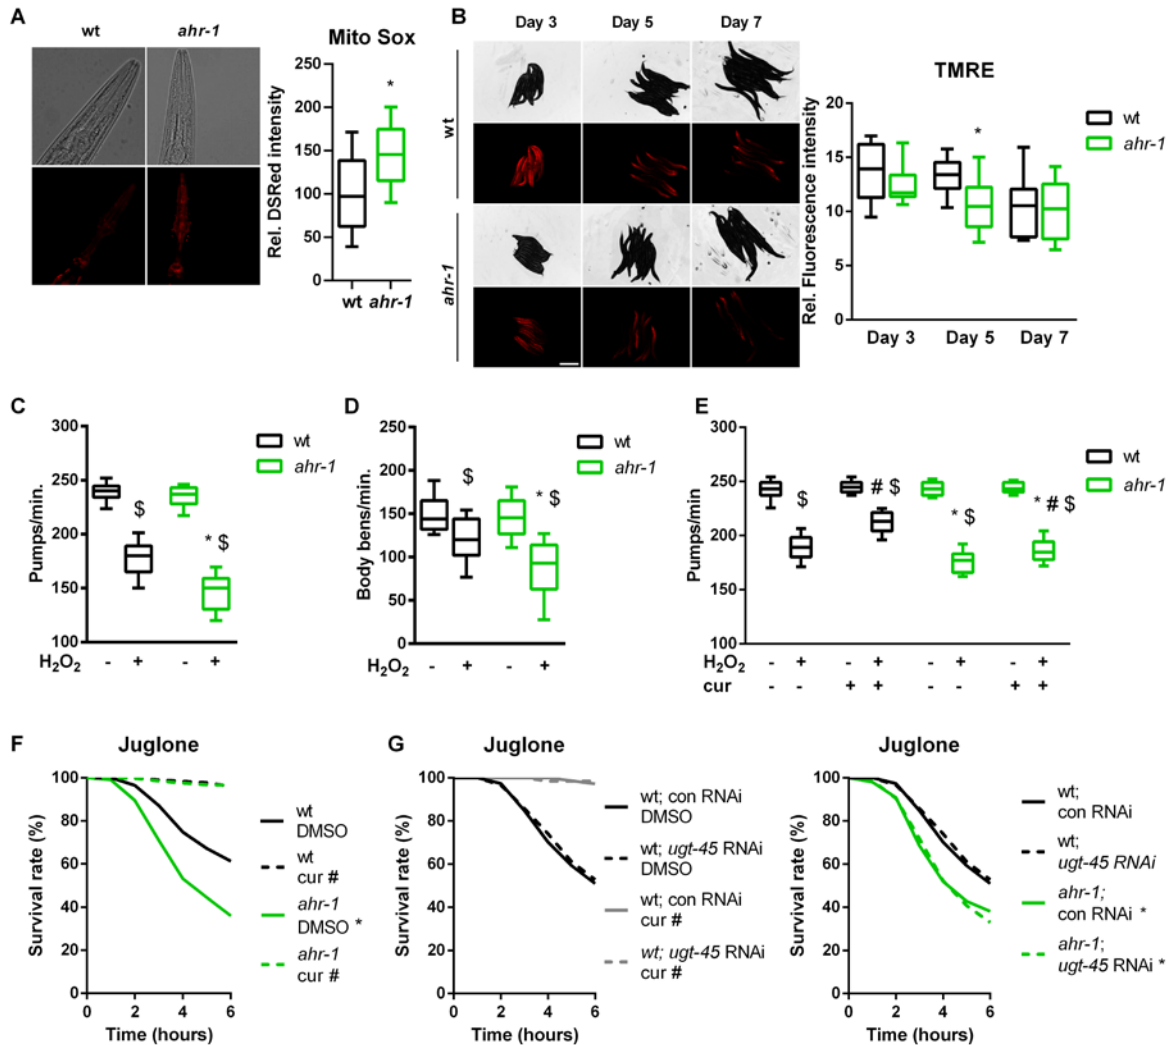

260

261 **Figure 4. AHR-1 and curcumin independently protect against oxidative stress.**

262 **A)** Representative images (left) and DSRed intensity quantification (right) in MitoSOX-stained wt or *ahr-1*  
 263 nematodes. Boxplots show pooled data from 129-135 worms/condition in 3 experiments. **B)** The  
 264 mitochondria membrane potential was assessed by TRME staining in nematodes of indicated ages.  
 265 Representative images (left) and the quantification of the TMRE fluorescence intensity (right) are presented.  
 266 Boxplots show pooled data from 3 experiments. **C-D)** Pharyngeal pumping activity (**C**) and motility (**D**)  
 267 of wt and *ahr-1* mutants after H<sub>2</sub>O<sub>2</sub> treatment. Boxplots show pooled data from 39-54 (C) or 35-36  
 268 worms/condition (D) in 3-4 experiments. \*p-value < 0.05 vs. wt, \$p-value < 0.05 vs. control treatment,  
 269 statistical test: 1-way ANOVA with Tukey's multiple comparisons test. **E)** Pharyngeal pumping of  
 270 curcumin-treated nematodes after H<sub>2</sub>O<sub>2</sub> treatment. Boxplots show pooled data from 32 worms/condition  
 271 in 2 experiments. \*p-value < 0.05 vs. wt, #p-value < 0.05 cur vs. DMSO treatment, \$p-value < 0.05 H<sub>2</sub>O<sub>2</sub>  
 272 vs. control statistical test: 2-way ANOVA with Tukey's multiple comparisons test. **F)** Influence of  
 273 curcumin on juglone-induced toxicity. Survival curves show pooled data of 500 worms/condition in 20  
 274 experiments. \*significance *ahr-1* vs. wt, #significance curcumin vs. DMSO, Bonferroni p-value < 0.05.  
 275 **G)** Effect of *ugt-45* RNAi in curcumin-fed wt and *ahr-1* worms. Survival curves show pooled data of 150  
 276 worms/condition in 6 experiments. Statistical test: Log-Rank test, \*significance *ahr-1* vs. wt, #significance  
 277 curcumin vs. DMSO, Bonferroni p-value < 0.05. No statistical significance was observed in *ugt-45* vs.  
 278 control RNAi-treated worms.

279



Brinkmann et. al

## 280 **Nrf2/SKN-1 mediates the AhR-independent effects of curcumin**

281 To further evaluate AhR-curcumin crosstalk in additional age-related features, we measured  
282 the migratory capacity in human primary EC – a hallmark for vessel functionality, which  
283 declines with age (Lahtenvuo and Rosenzweig, 2012) and is reduced by AhR activation  
284 (Eckers et al., 2016). In line with the anti-aging activity of *ahr-1* suppression and of curcumin,  
285 AhR overexpression significantly inhibited, while curcumin increased, the migratory capacity  
286 of primary human EC (**Fig 5A**). Of note, the induction of migratory ability by curcumin was  
287 comparable in empty vector- or AhR expression vector-transfected cells (**Fig 5A**). However,  
288 migration of curcumin-treated cells was significantly reduced by AhR overexpression: curcumin  
289 induces in empty vector-transfected cells up to 60 migrated cells per high power field, while in  
290 AhR overexpressing cells only up to 25 cells per high power field (**Fig 5A**). These data suggest  
291 that the pro-migratory effect of curcumin is modulated by AhR-independent mechanisms but  
292 possibly also by a reduction of AhR activity. We next determined intracellular AhR distribution  
293 and the expression of *cyp1a1* in curcumin-treated human EC. Curcumin did not affect AhR-  
294 nuclear translocation (**Fig 5B**) or *cyp1a1* expression (**Fig 5C**).

295 In search of pathways modulated by curcumin in an AhR-independent manner, we turned back  
296 to nematode transcriptomic profiles to find transcription factors regulating genes significantly  
297 modulated by loss of *ahr-1* or by curcumin treatment in wild-type animals (**Table 1**). This *in*  
298 *silico* search identified the redox transcription factor SKN-1, the ortholog of human Nrf2  
299 (nuclear factor erythroid 2-related factor 2), whose activation by curcumin (Ashrafizadeh et al.,  
300 2020) has been often reported as a possible mediator of its anti-oxidant activity (Chiu et al.,  
301 2020, Li et al., 2021). Accordingly, the prototype *C. elegans* Nrf2/SKN-1-dependent gene, *gst-*  
302 *4*, is overexpressed in the *ahr-1* mutant (Brinkmann et al., 2020b) and induced by curcumin in  
303 wild-type and even more in the *ahr-1* mutant (**Fig 5D**). Moreover, curcumin increased  
304 stabilization and nuclear translocation of Nrf2 in primary human EC (**Fig 5E**) and induced the  
305 expression of manganese superoxide dismutase (*Sod2*) – a classic Nrf2 target gene – in the  
306 cells transfected with an empty vector or in cells in which AhR has been silenced by shRNA  
307 (**Fig 5F**). The lack of *Sod2* induction by AhR shRNA in EC may be due to a partial reduction

Brinkmann et. al

308 (50%) in *AhR* expression (**Fig S3D**), which may not be sufficient to trigger the activation of Nrf2  
309 or of additional transcription factor (TF), which in *C. elegans* might concur to the induction of  
310 the *gst-4* (Detienne et al., 2016) upon complete AhR depletion. Interestingly, *Hpgds*, a homolog  
311 of *C. elegans gst-4*, was significantly increased in the brain of AhR KO mice (**Fig S3A**) but it is  
312 not a target of Nrf2. Further evidence for possible Nrf2/SKN-1 independent signaling activated  
313 by *ahr-1* depletion is that the activation of the *gst-4* by curcumin is completely suppressed by  
314 *skn-1* RNAi in the *C. elegans* wild-type, whereas *ahr-1* mutants still induce *gst-4* despite *skn-*  
315 *1* depletion (**Fig 5G, H**). However, *skn-1* RNAi reduced oxidative stress resistance in both wild-  
316 type and *ahr-1(ju145)* (**Fig 5I**). Unexpectedly, *skn-1* silencing did not affect the juglone  
317 resistance of curcumin-treated animals (**Fig 5I**). Our data reveal a complex scenario whereby  
318 curcumin promotes different anti-aging features relying either on AhR-dependent or AhR-  
319 independent but Nrf2/SKN-1-dependent (and additional) signaling.

Brinkmann et. al

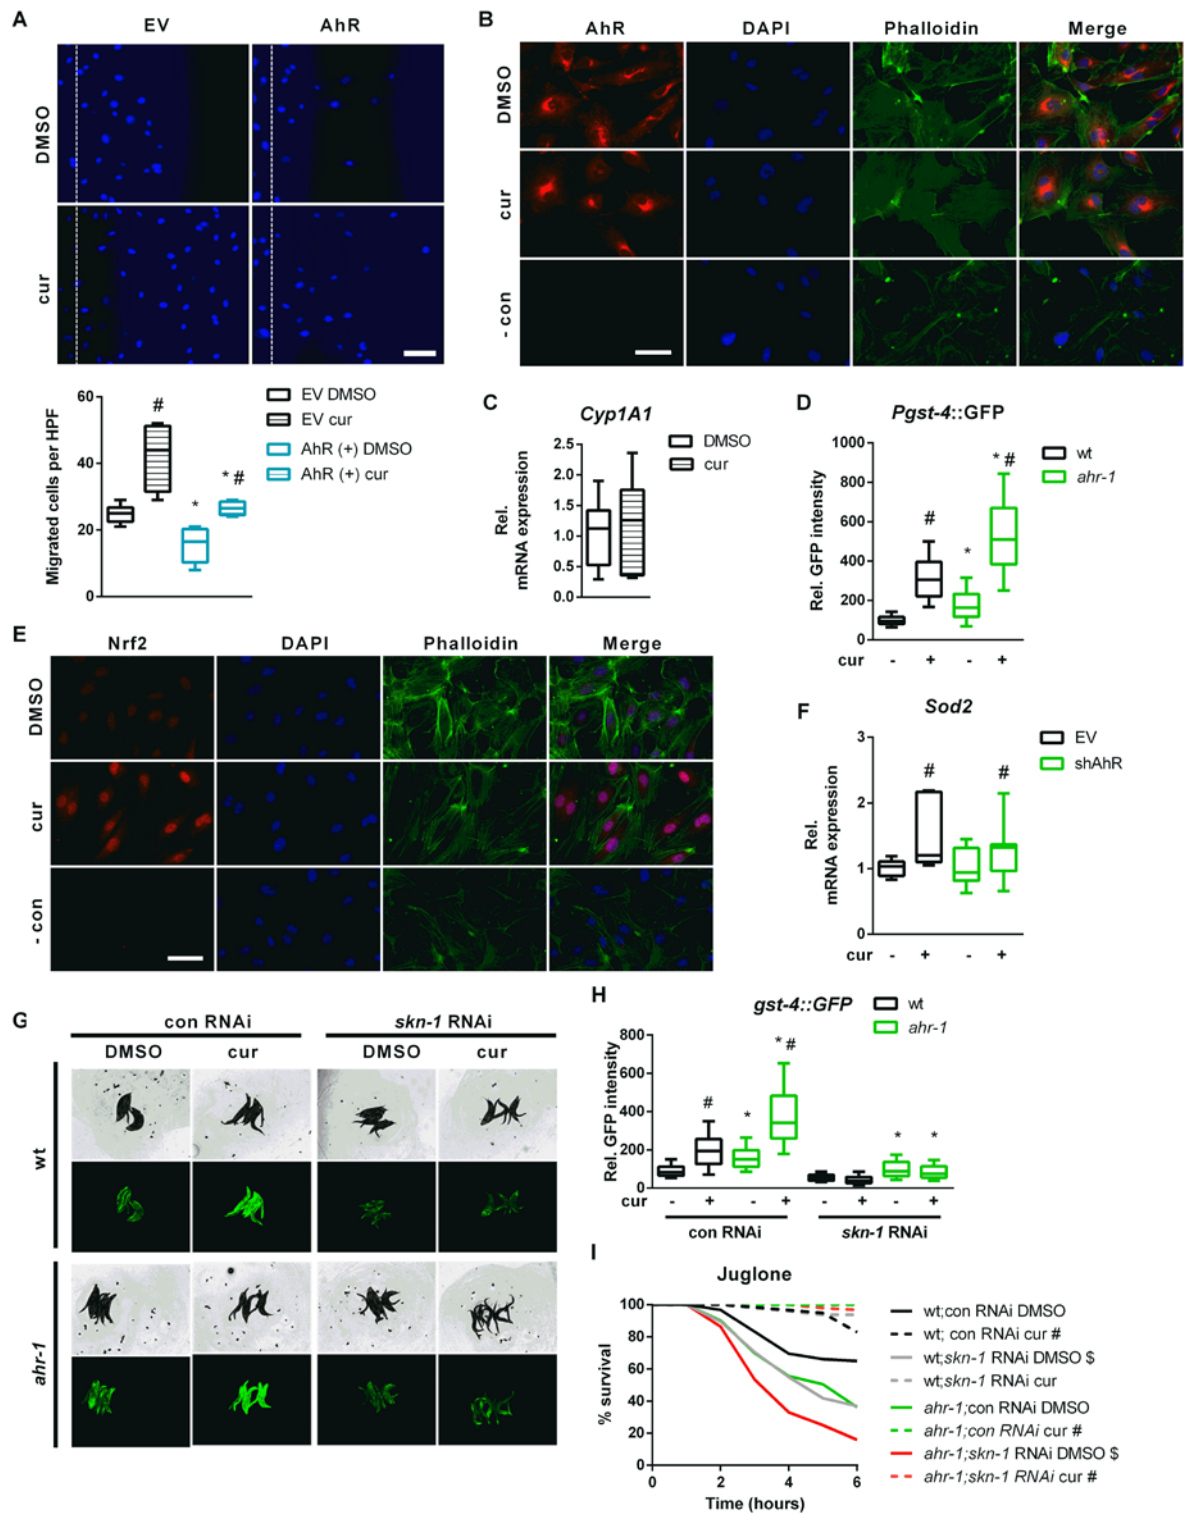

320

321 **Figure 5. Curcumin activates Nrf2/SKN-1 independent of the AhR.**

322 **A)** Scratch wound assay in curcumin (cur)- or DMSO-treated human primary EC transfected with an  
 323 empty vector (EV) or an expression vector for human AhR. Upper panel: representative pictures; the  
 324 dashed line represents migration start. Scale bar: 100  $\mu$ m. Lower panel: quantification; boxplots show  
 325 data of 4-6 experiments. Statistical test: 1-way ANOVA, \* $p < 0.05$  vs. EV, # $p < 0.05$  vs. DMSO. **B, C)**  
 326 Human primary EC were treated with cur or DMSO. **B)** Representative immunostainings: AhR is stained  
 327 in red, nuclei were visualized with DAPI (blue), the cytoskeleton is counterstained with phalloidin (green),  
 328 merge shows an overlay of all fluorescence channels. In the negative control (- con) the first antibody  
 329 was omitted and cells were stained with Alexa 488-coupled phalloidin and DAPI. Scale bar: 50  $\mu$ m. **C)**  
 330 Relative *cyp1a1* expression was assessed by qPCR. Mean expression in the DMSO-treated controls

Brinkmann et. al

331 was set to 1. Boxplots show data of 7 experiments. **D)** *Pgst-4::GFP* expression in DMSO- and curcumin-  
332 treated (cur) wt and *ahr-1* worms. Boxplots show pooled data of 118-138 worms/condition in 4  
333 experiments. \*p-value < 0.05 vs. wt, #p-value < 0.05 vs. DMSO treatment, statistical test: 1-way ANOVA.  
334 **E)** Representative immunostaining images of human primary EC treated with cur or DMSO: Nrf2 is  
335 stained in red, nuclei were visualized with DAPI (blue), the cytoskeleton is counterstained with phalloidin  
336 (green), merge shows an overlay of all fluorescence channels. In the negative control (- con) the first  
337 antibody was omitted and cells were stained with Alexa 488-coupled phalloidin and DAPI. Scale bar: 50  
338  $\mu\text{m}$ . **F)** Human primary EC were transfected with an empty vector (EV) or an expression vector for an  
339 shRNA targeting the human AhR transcript (shAhR). Relative *sod2* expression was assessed by qPCR,  
340 mean expression in the EV transfected cells was set to 1. Boxplots show data of 7 experiments. #p<0.05  
341 vs. respective control. **G-H)** *Pgst-4::GFP* expression in DMSO- or cur-treated wt and *ahr-1* nematodes  
342 subjected to control or *skn-1* RNAi. Representative images (G) and *gst-4*-driven GFP quantification (H)  
343 are shown. Boxplots show pooled data of 103-189 worms/condition in 4 experiments. **I)** Juglone stress  
344 survival in curcumin- or DMSO-treated wt and *ahr-1* nematodes subjected to control or *skn-1* RNAi.  
345 Kaplan Meier survival curves show pooled data of 100 worms/condition in 4 experiments. Statistical test:  
346 Log-Rank test, \*significance *ahr-1* vs. wt, #significance curcumin vs. DMSO, \$significance *skn-1* vs. con  
347 RNAi, Bonferroni p-value < 0.05.

348

### 349 **Curcumin and pro-oxidants display opposite effects on AHR-1 activity**

350 Consistent with the anti-aging effect of reduced AhR expression/activity, our data suggest that  
351 curcumin may extend the lifespan of *C. elegans* by suppressing AHR-1-regulated pathways  
352 through reduction of AHR-1 expression/activity or acting on common downstream signaling  
353 pathways. Hence, we tried to quantify AHR-1 activity in *C. elegans* but numerous attempts to  
354 evaluate AHR-1 expression and subcellular localization using antibodies (against mammalian  
355 AhR or customized antibodies against CeAhR) or fluorescently-tagged reporters (OP562,  
356 UL1709, ZG93), did not give meaningful evidence. Considering that AHR-1 binds to XREs *in*  
357 *vitro* (Powell-Coffman et al., 1998) we thought to use XRE-driven gene expression as a readout  
358 for AHR-1 activity. Thus, we turned to monkey derived Cos7 cells, which do not express  
359 endogenous AhR and thus display no endogenous AhR activity (Abnet et al., 1999, Ema et al.,  
360 1994) and can be exploited to monitor XRE-driven Luciferase induction as a readout for AHR-  
361 1 activity (Larigot et al., *submitted along with this study*). When Cos7 cells were co-transfected  
362 with vectors expressing *C. elegans* AhR/*ahr-1*, ARNT/*aha-1*, and a luciferase-coupled XRE-  
363 containing promoter of the human *CYP1A1* gene (Morel and Barouki, 1998) AHR-1 showed  
364 low activity in basal (vehicle-treated) conditions. Of note, treatment with curcumin or other  
365 nutraceuticals that promote healthy aging in *C. elegans*, such as lutein (Maglioni et al., 2022)  
366 and resveratrol (Regitz et al., 2016, Wood et al., 2004), significantly suppressed AHR-1 activity

Brinkmann et. al

367 **(Fig 6A-C)**. Instead, BaP and leflunomide, known AhR activators in mammals, did not affect  
368 AHR-1 activity **(Fig 6A-B)** at the concentrations we used. Notably, AHR-1 activity was  
369 abolished in Cos7 cells transfected with a vector expressing the *ahr-1(ju145)* allele instead of  
370 the wild-type allele **(Fig 6A-C)**, suggesting that *ju145* is a true loss-of-function allele and that  
371 the measured luciferase intensity is due to functional AHR-1.

372 We then sought to investigate whether curcumin reduces the activity of AHR-1 by direct binding  
373 or indirect modulation. To date, no ligands of *C. elegans* AHR-1 have been identified, and since  
374 there is no available information on its LBD, we performed an *in silico* analysis to characterize  
375 it. The two AHR-1 isoforms 1a and 1b were aligned and although different in length their PASB  
376 domain sequence is identical. This sequence was then aligned to the PASB domain of  
377 *Drosophila melanogaster*, and to those of two AhRs from vertebrates for which structural  
378 models were previously generated, namely mouse (*Mus musculus*) (Motto et al., 2011), and  
379 zebrafish (*Danio rerio*) (Fraccalvieri et al., 2013) **(Fig 6D)**. The alignment showed clear  
380 differences between species with the main peculiarity of invertebrates bearing sequence  
381 deletions in the most variable region in the PAS domain, corresponding to the flexible region  
382 including the helical bundle (C $\alpha$ , D $\alpha$ , E $\alpha$  helices) and the short loops connecting these  
383 elements **(Fig 6D, E)**. These deletions could reduce the available space in the binding cavity  
384 of these AhRs. We then generated a 3D model of the AHR-1 PASB by Homology Modelling.  
385 This model presents the typical PAS fold, but with a shorter D $\alpha$  helix compared to other AhRs.  
386 However, the internal cavity has some peculiarities; it contains more hydrophobic residues and  
387 is truncated in half by some internal side chains. In particular, H365 and H274 are faced and  
388 could form a hydrogen bond in the middle of the cavity; moreover, the Y332, L363, and L302  
389 side-chains could obstruct the cavity, reducing the internal space available for ligands **(Fig 6E)**.  
390 This small and truncated cavity most likely does not allow binding of large ligands (e.g., TCDD  
391 or curcumin). Similar to the AHR-1 structural model, a model of the zebrafish zfAhR1a showed  
392 that the LBD cavity is truncated compared to the TCDD-binding paralogs zfAhR1b and zfAhR2  
393 (Fraccalvieri et al., 2013). Small and flexible ligands, like leflunomide bind and activate the

Brinkmann et. al

394 zfAhR1a but the leflunomide concentration we tested did not activate AHR-1 in our Cos7 cell  
395 system (**Fig 6B**).

396 We then wondered whether mutations in amino acids responsible for the small cavity of the  
397 LBD might allow classical ligands to activate CeAhR. The CeAhR L363 residue (**Fig 6D**)  
398 corresponds to A375 in mAHR<sup>b-1</sup> and V375 in mAHR<sup>d</sup>, and this residue has a major impact on  
399 ligand binding (Poland and Glover, 1975). Similarly, T386 of zfAhR1a (**Fig 6D**), matching to  
400 A375 in mAHR<sup>b-1</sup> and A386 in zfAhR1b and zfAhR2, contributes to the lack of TCDD binding  
401 of zfAhR1a and, when mutated to alanine, restores TCDD sensitivity when Y296H is also  
402 introduced (Fraccalvieri et al., 2013). The amino acid Y296 is already a histidine in *C. elegans*  
403 (H274). Thus, we mutated only the leucine at the position L363 in the CeAhR vector to an  
404 alanine (L363A) (**Fig 6D, E** indicated by an arrow). Moreover, we mutated the nearby histidine  
405 at position H365 to glutamine (H365Q), which is Q377 in mice (**Fig 6D, E** indicated by an  
406 arrow) since it likely forms a hydrogen bond with H274 and might contribute to the small cavity  
407 of AHR-1 (**Fig 6E**). We then tested whether mammalian AhR ligands affect the AHR-1 activity  
408 when L363 and H365 are mutated. However, these alterations, instead of restoring response  
409 to xenobiotic ligands as in zebrafish (Fraccalvieri et al., 2013), abolished even the basal AHR-  
410 1 activity, similar to the *ju145* allele (**Fig 6F**). These results show clear differences between  
411 the LBDs of *C. elegans* and zebrafish but display that the LBD is fundamental for basal AHR-  
412 1 activity. Together with previous studies (Jones et al., 2013, Powell-Coffman et al., 1998, Qin  
413 and Powell-Coffman, 2004), our results suggest that AHR-1 is unlikely to be involved in the  
414 classical xenobiotic-induced transactivation response which thus may not be relevant to *ahr*-  
415 1-regulated physiological aging. Instead, plant-derived compounds might exert conserved  
416 effects at least in part via suppression of AHR-1-modulated pathways. Our 3D model suggests  
417 that curcumin does not modulate AHR-1 activity by binding its LBD. Thus, the suppression of  
418 AHR-1 activity by curcumin could be due to its antioxidant effect. Consistent with this  
419 possibility, and the increased sensitivity of the *C. elegans ahr-1* mutants to oxidative stress,  
420 we found that AHR-1 activity is indeed increased by ROS-inducing agents. Namely, Cos7 cells  
421 treated with the pro-oxidant rotenone displayed increased AhR activity when transfected with



Brinkmann et. al

422 either *C. elegans* or murine AhR but not when transfected with the *ju145* allele or the allele

423 with LBD mutations (Fig 6G, H).

424

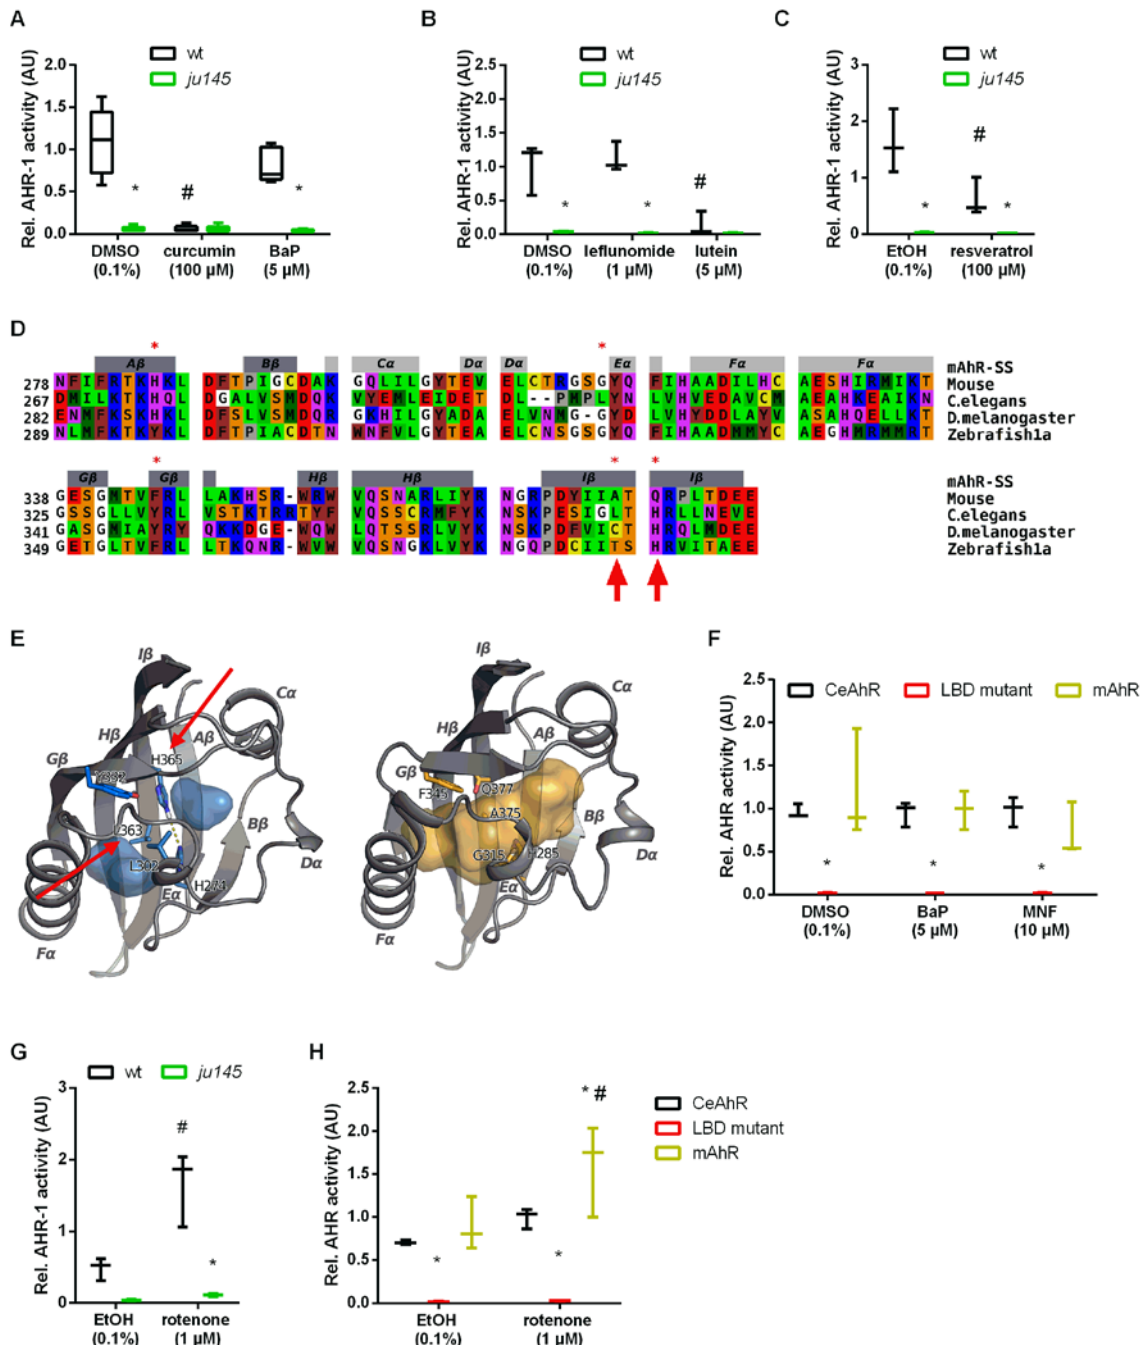

425

426 **Figure 6. Curcumin and pro-oxidants have opposite effects on AHR-1 activity.**

427 **A-C)** Evaluation of AHR-1 activity after treatment with the indicated compounds in Cos7 cells transfected  
 428 with either wt AHR-1 (wt) or AHR-1 carrying the *ju145* point mutation (*ju145*) and AHA-1 as well as an  
 429 XRE-inducible luciferase. Boxplots show data of 3-5 experiments. \*p-value < 0.05 vs. wt, #p-value < 0.05  
 430 vs. DMSO/EtOH, statistical test: 2-way ANOVA and Tukey's multiple comparisons test. **D)** Alignment of  
 431 the LBDs from *C. elegans*, *Drosophila*, and zebrafish AhRs. Color scheme for residues: red, acidic; blue,  
 432 basic; purple, polar; yellow, Cys; brown, aromatic; green, hydrophobic; orange, Ser, Thr; gray, Pro;  
 433 white, Gly. Secondary structures attributed by DSSPcont to the *CeAhR* PASB are indicated on top (light  
 434 gray bars for helices and dark gray bars for β-strands) and labeled according to the PAS domain



Brinkmann et. al

435 nomenclature. Asterisks mark the amino acids likely contributing to the inability of CeAhR to bind big  
436 ligands. Amino acids highlighted by an arrow were mutated for the investigation of the LBD function  
437 (panels F and H). **E**) 3D models of the CeAhR (left) and the mAHR (right) PASB domains obtained by  
438 Homology Modelling, shown in a cartoon representation. Secondary structures attributed by DSSPcont  
439 are labeled according to the PAS domain nomenclature. The colored internal area (blue for CeAhR and  
440 yellow for mAHR) defines the molecular surface of the binding cavity identified by CASTp. In the CeAhR  
441 model, the amino acids protruding into the binding cavity (asterisks in panel A) are labeled and shown  
442 as blue sticks. The mAHR amino acids corresponding to those displayed in the CeAhR model, are  
443 labeled and shown as yellow sticks. Amino acids highlighted by an arrow were mutated for studying the  
444 LBD function (panels F and H). **F**) AhR activity in BaP- or MNF-treated Cos7 cells transfected with either  
445 AHR-1, an AHR-1 with L363A and H365Q mutations (LBD mutant), or mouse AhR (mAHR), as well as  
446 AHA-1 and an XRE-driven luciferase. Boxplots show data of 3 experiments. Statistical analysis: 2-way  
447 ANOVA and Tukey's multiple comparisons test. \*p-value < 0.05 vs. wt, #p-value < 0.05 vs. DMSO. **G**)  
448 Effect of rotenone on AhR activity in Cos7 cells transfected with AHR-1 (either wt or *ju145*) as well as  
449 AHA-1 and an XRE-driven luciferase. Boxplots show data of 3 experiments. Statistical analysis: 2-way  
450 ANOVA and Tukey's multiple comparisons test. \* p-value < 0.05 vs. wt, #p-value < 0.05 vs. DMSO. **H**)  
451 Effect of rotenone on AhR activity in Cos7 cells transfected with either AHR-1, AHR-1 with L363A and  
452 H365Q mutations (LBD mutant), or mouse AhR (mAHR). Boxplots show data of 3 experiments.  
453 Statistical analysis: 2-way ANOVA with Tukey's multiple comparisons test. \*p-value < 0.05 vs. wt/AHR-  
454 1, #p-value < 0.05 vs. DMSO/EtOH.  
455

456 Overall, while CeAhR activation protects against oxidative stress early in life, its decreased  
457 expression counteracts aging, and mediates the beneficial anti-aging effect of curcumin.  
458 Curcumin may thus help balancing redox TF activation in a context- and time-dependent  
459 manner and favor AhR suppression directly through its anti-oxidant effect and/or through  
460 activation of Nrf2/SKN-1 (or other TF), which may concurrently mediate the anti-aging activity  
461 of curcumin.

Brinkmann et. al

## 462 Discussion

463 AhR was originally discovered in mammals for its xenobiotic response activity induced upon  
464 binding of environmental toxicants or endogenous ligands but modulators not relying on ligand-  
465 binding also exist but are much less investigated. *C. elegans* represents a unique model  
466 organism to investigate AhR activities independent of its classical xenobiotic response since  
467 CeAhR does not bind prototype AhR ligands (Powell-Coffman et al., 1998, Butler et al., 2001).  
468 Using this model we identified an evolutionarily conserved function for AhR in the aging  
469 process (Eckers et al., 2016) and showed that some of the mammalian AhR modulators (i.e.  
470 bacteria, BaP, UVB) affect aging parameters through AHR-1 in a context-dependent manner  
471 (Brinkmann et al., 2020b). Here, we followed up on our previous findings with a more  
472 mechanistic investigation of AhR-regulated aging features across species by the dietary  
473 polyphenol curcumin. Our combined *in vivo*, *in vitro* and *in silico* analyses revealed a complex  
474 scenario: while curcumin promotes anti-aging features in nematodes and human primary EC  
475 at least in part in an AhR-dependent manner, its anti-oxidant effects in both species rely on  
476 AhR-independent but primarily Nrf2/SKN-1 dependent mechanisms.

477 Curcumin delayed *C. elegans*' physiological aging in an AHR-1-dependent manner. In search  
478 of possible downstream *ahr-1*-dependent effectors of curcumin we employed targeted and  
479 unbiased approaches and found that the majority of differentially regulated genes upon  
480 curcumin treatment are regulated in an AHR-1-dependent manner. Moreover, many of these  
481 genes displayed a similar expression pattern in AHR-1-depleted and curcumin-treated animals  
482 suggesting curcumin is promoting lifespan extension via suppression of AHR-1 activity.  
483 Surprisingly, neither the targeted nor the transcriptomic analysis indicated a major role for  
484 classical AhR targets genes such as *cyps*, which instead were found largely under expressed  
485 in neurons (Larigot et al., submitted along with this study). Interestingly, these findings may  
486 indicate whole animals transcriptomic may mask neuronal-specific effects of AhR, in this  
487 specific case through *cyps* genes. Among the differentially expressed genes, many belong to  
488 phase-II-detoxification enzymes, such as *ugt-45*, which was increased by both *ahr-1* depletion  
489 (and in the brain of AhR KO mice) and curcumin treatment and to mediate their lifespan

Brinkmann et. al

490 extension. Instead, curcumin and *ahr-1* depletion increased the expression of another phase-  
491 II-detoxification enzyme, *gst-4*, through different mechanisms: the former relaying while the  
492 latter mainly independent of Nrf2/SKN-1, a classical redox TF inducing *gst-4* upon oxidative  
493 stress (Kahn et al., 2008). Moreover, while curcumin induces Nrf2/SKN-1-dependent  
494 responses in *C. elegans* (*gst-4* expression) and human primary EC (*Sod2* expression and  
495 migratory capacity), it also protects *C. elegans* against oxidative stress in an SKN-1-  
496 independent manner. In *C. elegans* curcumin cannot extend lifespan in the very sick *skn-*  
497 *1(zu67)* mutants (Pecker et al., 1986), while *gst-4* can be induced in an SKN-1-independent  
498 manner by EGF signaling (Detienne et al., 2016) and a crosstalk between the EGF pathway  
499 and the AhR has been reported in mammals (Fritsche et al., 2007).

500 We also observed an AHR-1-independent effect of curcumin on health-span in nematode  
501 models for Huntington's and Parkinson's disease respectively. In these strains curcumin  
502 treatment increased the number of protein aggregates to the same extent as AHR-1 deficiency,  
503 indicating either a protective effect of the protein aggregation itself and/or curcumin activation  
504 of pathways protecting against protein aggregation independently of *ahr-1* depletion. The  
505 influence of curcumin on protein aggregation is controversial: it was shown to inhibit fibril  
506 formation but also to bind pre-fibrillar/oligomeric species of amyloidogenic proteins, thereby  
507 accelerating their aggregation and reducing the overall neurotoxicity (Ahmad et al., 2017). Of  
508 note, caffeine, which also protects against features of cardiovascular aging (Ale-Agha et al.,  
509 2018, Spyridopoulos et al., 2008), also prevents A $\beta$ -induced paralysis without decreasing A $\beta$   
510 aggregates but through the activation of the protective Nrf2/SKN-1-dependent pathway (Dostal  
511 et al., 2010). It will be important to assess whether the protective effect induced by curcumin  
512 or *ahr-1* depletion in the *C. elegans* disease models, is mediated by mechanisms promoting  
513 the removal of oligomeric/pre-fibrillar species into less toxic aggregates and/or by activation of  
514 other mechanisms such as Nrf2/SKN-1, which may concurrently protect against proteotoxicity.  
515 Noteworthy, detoxification enzymes may contain both XRE and ARE (antioxidant responsive  
516 elements) and an interplay between Nrf2/ARE and AhR/XRE regulated signaling has been  
517 described (Kohle and Bock, 2007). It will be thus interesting to clarify how curcumin promotes

Brinkmann et. al

518 its different beneficial anti-aging effects through the balance between Nrf2 and AhR-regulated  
519 signaling.

520 We showed that curcumin inhibits AHR-1 activity. In mammals, it was suggested the AhR  
521 inhibitory effect of curcumin is mediated by direct LBD binding (Ciolino et al., 1998) or inhibition  
522 of the protein kinase C that phosphorylates AhR (Nishiumi et al., 2007). Another study  
523 indicated that the transcriptional activity of the AhR is dependent on cellular redox status and  
524 the chromatin structure, which are both influenced by curcumin (Mohammadi-Bardbori et al.,  
525 2016). While AHR-1 does not bind TCDD, it binds XRE *in vitro* (Bell and Poland, 2000) but  
526 systematic studies, addressing the potential of polyaromatic hydrocarbons, or other  
527 mammalian AhR ligands to modulate AHR-1, are missing primarily due to the lack of suitable  
528 tools to assess that. Our studies attempt to fill this gap and, exploiting Cos7 cells expressing  
529 AHR-1 coupled to luciferase assays (Larigot et al., submitted along with this study) and *in silico*  
530 modeling of *C. elegans* LBD, revealed that curcumin suppresses AHR-1 activity, but likely not  
531 by direct LBD binding. The *in vitro* assay used in our study confirmed CeAhR is not activated  
532 through the classical xenobiotics signaling. Yet, it would not reveal activities due to AhR binding  
533 to DNA sequences other than the “classical” XRE found in *Cyp1a1* such as the  
534 polyphenol(quercetin)-responsive XRE found in PON1 (Guedard et al., 2004, Guyot et al.,  
535 2013). Immunostaining in human primary EC also argues against curcumin inducing AhR  
536 nuclear translocation, which, along with the promoting effect of the migratory capacity in AhR  
537 overexpressing cells, may also indicate that curcumin suppresses AhR activity.

538 We propose the inhibitory effect of curcumin, rather than relying on AhR binding, involves its  
539 antioxidant ability, which may indeed be associated with, or even depend on, the activation of  
540 Nrf2/SKN-1. Mammalian AhR is activated by ROS via LBD-independent oxidative modification  
541 (Wang et al., 2019) but our data show that the induction of AHR-1 activity by the pro-oxidant  
542 rotenone required the LBD. An indirect mechanism of ROS-mediated AhR activation is the  
543 formation of the potent AhR ligand FICZ (Smirnova et al., 2016). Yet, FICZ is a big planar  
544 molecule that, according to our *in silico* model, would not fit the AHR-1 LBD. While the exact  
545 mechanism by which AHR-1 activity is promoted by ROS and inhibited by curcumin (either via

Brinkmann et. al

546 direct ROS quenching or indirectly via activation of Nrf2 or other antioxidants regulatory genes)  
547 remains to be established, this is strongly supported by our findings: AHR-1 is activated by  
548 rotenone and *ahr-1* mutants display more mtROS, reduced mitochondrial membrane potential  
549 and are more sensitive to H<sub>2</sub>O<sub>2</sub> and juglone as well as to UVB and BaP (Brinkmann et al.,  
550 2020b), both of which produce ROS (Heck et al., 2003, Wu et al., 2015). In this context, it is  
551 interesting to note that *ahr-1* mutants display mild alteration of mitochondrial functions, which  
552 resemble those of mitohormesis (Ristow and Schmeisser, 2014). This suggests *ahr-1* deletion  
553 (and possibly curcumin by inhibiting AHR-1) may promote health-span through mild  
554 mitochondrial stress, which extends lifespan through detoxification genes similarly modulated  
555 by *ahr-1* depletion (Herholz et al., 2019, Mao et al., 2019). Moreover, whether, Nrf2/SKN-1 and  
556 mitochondria play a role in modulating AHR-1 activity upon curcumin treatment is an interesting  
557 possibility that remains to be validated.

558 Overall, our findings suggest the ancestral function of the AhR might be in the regulation of  
559 phase-II-enzymes related to antioxidant rather than xenobiotic responses. Opposite to the  
560 detrimental effects induced by high levels of ROS, the beneficial effects promoted by AhR-  
561 deficiency may be mediated by mild mitochondria stress and/or mild ROS production  
562 (mitohormesis), which also rely on Nrf2/SKN-1. We also provide strong evidence for the  
563 interaction between curcumin and the AhR. Curcumin inhibition of AhR signaling is  
564 evolutionarily conserved and is likely not mediated by binding to the AhR LBD, but rather  
565 through curcumin's ROS-scavenging properties or the activation of Nrf2/SKN-1. The Nrf2  
566 signaling pathway can indeed be activated by curcumin in different ways (Ashrafizadeh et al.,  
567 2020). Finally, our data also showed curcumin promotes anti-aging effects also in an AhR-  
568 independent manner in both *C. elegans* (increased *gst-4* expression and oxidative stress  
569 resistance) and human primary EC (increased Sod2 expression and migratory capacity), which  
570 could also explain the additive effects of curcumin and loss of AHR-1 function on the health-  
571 span of polyQ-expressing animals. Overall, curcumin may help balancing the activity of  
572 different transcription factors involved in detoxification/antioxidants responses (suppress AhR

Brinkmann et. al

573 and activate Nrf2) in conditions where these are altered (increase AhR and decrease  
574 Nrf2/SKN-1), such as aging or age-associated disorders.

Brinkmann et. al

## 575 Materials and Methods

### 576 *C. elegans*

#### 577 *C. elegans* strains and cultivation

578 We used the following *C. elegans* strains: N2 [wild-type], CZ2485 [*ahr-1(ju145)*], NV38b [*ahr-*  
579 *1(ju145); unc-54p::Q40::YFP*], NV38wt [*unc-54p::Q40::YFP*] (original strain AM141(Morley et  
580 al., 2002)), NV42a [*unc-54p::alphasynuclein::YFP, ahr-1(ju145)*], NV42wt [*unc-*  
581 *54p::alphasynuclein::YFP*] (original strain NL5901 (van Ham et al., 2008)), NV35a [*ahr-*  
582 *1(ju145); (pAF15)gst-4p::GFP::NLS*], NV35wt [*(pAF15)gst-4p::GFP::NLS*] (original strain  
583 CL2166). For maintenance, worms were kept synchronized by egg lay at 20 °C on Nematode  
584 Growth Media (NGM) plates and fed with *E. coli* OP50 according to methods described in  
585 (Brinkmann et al., 2020b). For the experiments, worms were synchronized on plates  
586 supplemented with *E. coli* HT115(DE3) on plates supplemented with 1 mM IPTG.

#### 587 Gene silencing by RNA-mediated interference (RNAi)

588 Gene silencing was achieved through feeding *E. coli* HT115(DE3) expressing plasmids with  
589 dsRNA against specific genes (Timmons and Fire, 1998). RNAi feeding was applied  
590 continuously from birth to death. For juglone resistance assay with HT115(*skn-1*) bacteria,  
591 RNAi feeding was applied from L4 worms for 24 hours before transferring them to fresh juglone  
592 plates.

#### 593 *E. coli* strains and growth

594 Bacteria were grown in LB medium at 37 °C overnight. When using *E. coli* carrying vectors the  
595 LB medium was supplemented with 0.01% of ampicillin and 0.0005% of tetracycline. *E. coli*  
596 HT115(L4440), HT115(*ugt-45*), HT115(*skn-1*), and OP50 were obtained from the Ahringer  
597 *C. elegans* RNAi library (Kamath and Ahringer, 2003).

#### 598 Lifespan



Brinkmann et. al

599 The lifespan analysis was started from a synchronized population of worms, which was  
600 transferred to fresh NGM plates daily during the fertile period. After the fertile phase, the  
601 animals were transferred every alternate day. Dead, alive, and censored animals were scored  
602 during the transferring process. Animals were counted as dead when they did show neither  
603 movement, nor response to a manual stimulus with a platinum wire, nor pharyngeal pumping  
604 activity. Animals with internal hatching (bags), an exploded vulva, or which died desiccated on  
605 the wall were censored. The number of dead and censored animals was used for survival  
606 analysis in OASIS (Yang et al., 2011) or OASIS 2 (Han et al., 2016). For the calculation of the  
607 mean lifespan and the survival curve in OASIS and OASIS 2, the Kaplan Meier estimator was  
608 used, and the p-values were calculated using the log-rank test between pooled populations of  
609 animals.

#### 610 **Movement/Healthspan**

611 The movement was set as a parameter for healthy aging, and the phase of the active  
612 movement is referred to as healthspan. It was assessed in the populations used for the lifespan  
613 assay. Animals, which were either crawling spontaneously or after a manual stimulus, were  
614 considered as moving while dead animals or animals without crawling behavior were  
615 considered as not moving. Statistical analysis was done as described for lifespan.

#### 616 **Curcumin treatment of *C. elegans***

617 Curcumin (Sigma Aldrich, C7727) was dissolved in DMSO (Carl Roth, 4720) in a concentration  
618 of 100 mM and supplied to the NGM after autoclaving. The final concentration of curcumin in  
619 the media was 100  $\mu$ M (0.1% DMSO). Control plates contained 0.1% DMSO. Worms were  
620 treated continuously starting from eggs.

#### 621 **Quantification of polyQ aggregates**

622 PolyQ<sub>40</sub> aggregates were visualized by fluorescence microscopy (100x magnification) in 10-  
623 days old worms anesthetized with 15 mM sodium azide (Sigma, S2002). To assess the number  
624 of aggregates, images were stitched using the Fiji pairwise stitching plugin (Preibisch et al.,

Brinkmann et. al

625 2009) to create whole worms and the number of the aggregates was quantified in Fiji  
626 (Schindelin et al., 2012) using the plugin “Analyze Particles”.

### 627 **Quantification of $\alpha$ -synuclein aggregates**

628  $\alpha$ -synuclein aggregates in the head muscles of 7-days old worms were visualized by  
629 fluorescence microscopy (400x magnification) in worms anesthetized with 15 mM sodium  
630 azide (Sigma, S2002). Pictures were segmented using Ilastik (version 1.3.0) (available on  
631 <https://www.ilastik.org/>) (Sommer et al., 2011). The segmented pictures were used to analyze  
632 the number of aggregates in Fiji (Schindelin et al., 2012) using the plugin “Analyze Particles”.

### 633 **Microarray and GO term analysis**

634 Samples from 5 independent replicates with approximately 1000 3-days old worms per  
635 condition were collected, the RNA was extracted and loaded to an Affymetrix Chip. The  
636 microarray raw data in the format of CEL were analyzed using the software R (version 3.4.2)  
637 and Bioconductor (Huber et al., 2015). Background correction, normalization, and expression  
638 calculation were performed with the oligo package (Carvalho and Irizarry, 2010) and the RMA  
639 method. For quality control of the array, the package arrayQualityMetrics\_3.34.0 (Kauffmann  
640 et al., 2009) was used. Because of the quality measures, sample ahr-1C5 was excluded from  
641 further analysis. The differentially expressed genes were identified using the limma package  
642 and a linear model and moderated t-statistic with FDR to test for multiple comparisons (Ritchie  
643 et al., 2015). A p-value of 0.1 was applied. The differentially expressed genes were analyzed  
644 for Gene Ontology term enrichment using Cytoscape (version 3.6.0) (Shannon et al., 2003)  
645 with the plugin ClueGo (version 2.5.0) (Bindea et al., 2009). The microarray data can be  
646 accessed through the Gene Expression Omnibus accession no. GSE195769.

### 647 **ROS quantification**

648 MtROS have been detected in live wt and *ahr-1* mutants worms using MitoSOX Red  
649 (ThermoFisher Scientific). Nematodes have been synchronized by egg-laying onto IPTG  
650 plates using HT115(L4440) bacteria as food. 48 hours later, 50 animals at the L4 stage have

Brinkmann et. al

651 been transferred onto freshly prepared 10  $\mu$ M MitoSOX Red plates seeded with UV-killed  
652 HT115(L4440). The worms have been incubated in the dark at 20°C. Following 16-hour  
653 incubation, they have been moved onto new NGM plates spread with live HT115(L4440) for  
654 1h to remove residual dye from the intestines. For imaging, nematodes were mounted onto  
655 2% agarose pad slides, anesthetized by adding 10mM levamisole and fixed by ProLong™  
656 Glass Antifade Mountant (ThermoFisher Scientific). Images were acquired immediately with a  
657 Zeiss Axio Imager M1 microscope (Carl Zeiss, Inc.) using a 40X objective and a DsRed Filter.  
658 Afterward, the worms head region has been manually selected and the integrated intensity  
659 was calculated using the imaging software Fiji (Schindelin et al., 2012).

#### 660 **Tetramethylrhodamine ethyl ester (TMRE) assay**

661 To assess the mitochondrial membrane potential, nematodes were synchronized by egg-laying  
662 on IPTG plates seeded with HT115(L4440) bacteria. On the day of the experiment, TMRE was  
663 dissolved in DMSO to a concentration of 5 mM and then diluted to 30  $\mu$ M with heat-inactivated  
664 HT115(L4440) (30 min, 65°C). A total of 150  $\mu$ l of this solution was added per plate and left to  
665 dry in the dark for approximately 30 minutes. Sixty adult synchronous worms at 1, 3, or 5 days  
666 of adulthood have been picked onto the TMRE plates prepared and left to the stain to absorb  
667 for 2 hours in the dark at 20°C. After staining, worms have been transferred onto IPTG plates  
668 seeded with heat-inactivated HT115(L4440) and incubated for 1 h in the dark at 20 °C, to  
669 remove residual dye from the intestines. For imaging, 10 nematodes were mounted onto 2%  
670 agarose pad slides, anesthetized by adding 10mM levamisole, and fixed by ProLong™ Glass  
671 Antifade Mountant (ThermoFisher Scientific). For each experimental run, 5 slides have been  
672 prepared per group. Images were acquired immediately with a Zeiss Axio Imager M1  
673 microscope (Carl Zeiss, Inc.) using a 2.5X objective and a DsRed filter. The fluorescence  
674 intensity has been calculated using Fiji (Schindelin et al., 2012).

#### 675 **Pharyngeal pumping rate and motility assay**

676 N2 and CZ2485 nematodes have been synchronized by bleaching (Shaham, 2006) and the  
677 eggs were left to hatch in egg buffer (118 mM NaCl, 48 mM KCl, 2 mM CaCl<sub>2</sub>, 2 mM MgCl<sub>2</sub>,

Brinkmann et. al

678 25 mM Hepes, pH 7.3) overnight, on orbital shaking. L1 larvae have been spotted onto NGM  
679 supplemented with 1 mM IPTG and containing 0.1% DMSO or 100  $\mu$ M curcumin.  
680 HT115(L4440) bacteria have been used as food. Young adult worms have been collected with  
681 M9 buffer, centrifuged (300 g x 3 min), and washed twice to remove bacteria. Worms have  
682 been incubated with 0-1 mM H<sub>2</sub>O<sub>2</sub> (Sigma-Aldrich, 31642) (100 worms/100  $\mu$ l), for 2 hours on  
683 orbital shaking. Control worms have been incubated with M9 buffer only. After 2 hours, worms  
684 have been moved onto NGM supplemented with 1 mM IPTG and containing 0.1% DMSO or  
685 100  $\mu$ M curcumin and seeded with HT115(L4440) bacteria as food. The pharyngeal pumping  
686 rate, scored by counting the number of times the terminal bulb of the pharynx contracted over  
687 a 1-minute interval (pumps/min), and the motility assay, scored by counting the number of body  
688 thrash (body bends/min) in M9 buffer over a 1-minute interval, have been scored from 2 hours  
689 up to 20 hours later.

#### 690 **Acute juglone sensitivity assay**

691 N2 and CZ2485 nematodes have been synchronized by egg-laying onto NGM plates with  
692 either DMSO or 100  $\mu$ M of curcumin. Plates have been supplemented with 1 mM IPTG and  
693 seeded with HT115(L4440) or HT115(*ugt-45*) bacteria as food. To evaluate the effect of *skn-1*  
694 RNAi, the worms have been synchronized by egg-laying onto DMSO or curcumin plates  
695 seeded with HT115(L4440) bacteria. As nematodes reached the L4 larval stage, they were  
696 transferred for 24h onto DMSO or curcumin plates seeded with HT115(*skn-1*) bacteria. Day 1  
697 adult worms (25 worms) have been moved onto fresh NGM plates containing 200  $\mu$ M Juglone  
698 and seeded with 25  $\mu$ L of 10x concentrated bacteria overnight culture. Worm survival under  
699 juglone-induced oxidative stress has been checked by touch-provoked movement hourly, for  
700 6 hours. Animals were scored as dead when they failed to respond to touch with a platinum  
701 wire pick. Nematodes desiccated on the wall have been censored. The number of dead and  
702 censored animals has been scored and the Online Application for Survival analysis OASIS 2  
703 has been employed for survival analysis (Han et al., 2016).

704

#### 705 **Quantification of the *gst-4::GFP* intensity**

Brinkmann et. al

706 NV35wt and NV35a have been synchronized by egg-laying onto NGM plates supplemented  
707 with 1 mM IPTG and containing 0.1% DMSO or 100  $\mu$ M curcumin. HT115(L4440), HT115(ugt-  
708 45) and HT115(skn-1) bacteria have been used as food. To visualize GFP fluorescence, day  
709 1 adult worms have been anesthetized with 10 mM levamisole hydrochloride solution and  
710 mounted on 2% agarose pads. Images have been immediately acquired with a Zeiss Axio  
711 Imager M1 microscope (Carl Zeiss, Inc., 2,5x magnification) and then analyzed using the  
712 software CellProfiler. Briefly, images have been processed using a pipeline to segment worms  
713 in each image from bright field microscopy and separate them from the background. Then, the  
714 integrated GFP intensity has been measured per worm.

715

#### 716 **Semi-quantitative Real-time PCR (qPCR) in *C. elegans***

717 Samples from 3 independent replicates with approximately 1000 3-days old worms per  
718 condition were collected and RNA was extracted. After washing and elution, the RNA content  
719 was quantified by spectrophotometry, and 1-2  $\mu$ g of RNA was used for the cDNA synthesis  
720 (Omniscript RT Kit (Qiagen, 205111)). Primer pairs are listed in Table S1. For the Real-time  
721 qPCR, the cDNA was diluted at 1:20 in 10 mM TRIS (pH 8.0). For the reaction, the qPCR  
722 Green Core kit (Jena Biosciences, PCR-333L) or the GoTaq® qPCR kit (Promega, A6001)  
723 was used. The samples were run in a MyiQ2 cycler (BioRad), and the expression of each  
724 sample was measured in duplicate on the same multi-well plate. The expression was  
725 calculated relative to the reference genes *act-1* and *cdc-42* using the iQ5 software. All data  
726 collected were enabled for gene study according to the BioRad user instructions, and the  
727 expression was calculated using the normalized expression ( $ddC_T$ ). The efficiency of each  
728 primer pair reaction was added for correct quantification of the normalized expression. The  
729 efficiency was assessed with 1:20, 1:100, 1:500, and 1:2500 dilutions of the cDNA. From  
730 normalized expression values, the fold-change compared to wild-type was calculated for each  
731 replicate.

Brinkmann et. al

732 **Mammalian cells**

733 **Cultivation of Cos7 cells**

734 Cos7 cells were cultivated at 37 °C and 5% CO<sub>2</sub> in Dulbecco's Modified Eagle's Medium  
735 (DMEM (Gibco/ ThermoScientific)) with 1% pyruvate, 1% Glutamax and 10% Fetal Bovine  
736 Serum (FBS (Gibco/ ThermoScientific)) and additional Penicillin (10.000 Units/ml)/  
737 Streptomycin (10.000 µg/ml). As soon as the cells build a confluent cell lawn, they were  
738 detached from the base by using 0.05% Trypsin/EDTA (Thermo Scientific).

739 **Transfection Plasmids**

740 We used the following plasmids for the transfection of the Cos7 cells: pcDNA3, pcDNA3-AhR-  
741 1-VP16, pcDNA3-AhA-1-VP16, pcDNA3-AhR-1(ju145)-VP16, p1A1-FL, phRL-TK. The  
742 plasmids are described in (Larigot et al., submitted along with this study). The p1A1-FL plasmid  
743 carries an XRE-inducible luciferase, phRL-TK carries a renilla luciferase, and the pcDNA3-  
744 AhR-1-VP16 and pcDNA3-AhA-1-VP16 carry sequences for the expression of the *C. elegans*  
745 AHR-1 and AHA-1, respectively. For this study, we created pcDNA3-AhR-1(LBD)-VP16 by  
746 site-directed mutagenesis of the pcDNA3-AhR-1-VP16 plasmid with the QuikChange II Site-  
747 Directed Mutagenesis Kit (Agilent, 200523). The following primer pair was used to create an L  
748 to A substitution at L363, and an H to Q substitution at H365 of AHR-1: LBD-F  
749 5'-GAGAGCATCGGCGCGACCCAACGGCTGCTGAACGAG-3' and LBD-R  
750 5'-CTCGTTCAGCAGCCGTTGGGTCGCGCCGATGCTCTC-3'. Super-competent XL1-Blue  
751 cells were transformed with the obtained plasmid for amplification. The plasmid sequence was  
752 verified by Sanger Sequencing.

753 **Transient transfection of Cos7 cells**

754 24 hours before transfection 20,000 cells/well were seeded in a 48-well plate in 400 µl DMEM  
755 (+10% FBS + antibiotics) and incubated at 37 °C. Cells were then transfected with the following  
756 plasmid concentrations using lipofectamine 2000 (Invitrogen): p1A1-FL (244 ng/well), phRL-  
757 TK (36 ng/well), pcDNA3-AhA-1-VP16 (5 ng/well), and either pcDNA3-VP16 (10 ng/well),

Brinkmann et. al

758 pcDNA3-AhR-1-VP16 (5 ng/well) or pcDNA3-AhR-1(*ju145*)-VP16 (5 ng/well) as described in  
759 (Larigot et al., submitted along with this study). Lipofectamine 2000 was used in a  
760 concentration of 1 µl/well and pre-incubated with the respective plasmids in DMEM for 20  
761 minutes before use. For the transient transfection, Cos7 cells were incubated with the  
762 lipofectamine/plasmid mix for 3 hours in DMEM (+10% FBS) without antibiotics to avoid  
763 antibiotic-induced toxicity. Then, the transfection medium was removed and replaced by  
764 400 µl/well DMEM (+10% FBS + antibiotics). The transfected cells were incubated at 37 °C.  
765 On each plate, 2 wells of cells were not transfected and used for normalization purposes.

#### 766 **Treatment of Cos7 cells**

767 Stock solutions at concentrations 1000-times higher than the desired treatment concentration  
768 were prepared for all of the compounds. Curcumin (Sigma Aldrich), Benzo(a)pyrene (Sigma  
769 Aldrich), leflunomide (Sigma Aldrich), and lutein (Sigma Aldrich), were dissolved in DMSO  
770 (Carl Roth), while resveratrol (Sigma Aldrich) and rotenone (Sigma Aldrich) were dissolved in  
771 ethanol (Carl Roth). 24 hours after transfection the cell culture medium of the cells was  
772 replaced with a cell culture medium containing a 1:1000 dilution of the respective compound.  
773 The cells were treated for 24 hours before assessing the luciferase activity.

#### 774 **Luciferase assay (AhR activity)**

775 The AhR transcriptional activity was assessed by measuring the activity of an XRE-driven  
776 luciferase (Morel and Barouki, 1998). For this, a Dual-Luciferase Reporter Assay System  
777 (Promega, E1960) was used. After a 24-hour treatment, Cos7 cells were washed twice with  
778 PBS and then lysed for 15 minutes at RT using the passive lysis buffer included in the Dual-  
779 Luciferase Reporter Assay kit. 20 µl of the lysed cells were placed in a white 96-well plate and  
780 used for luminescence measurements. The luciferin (LARII) and renilla (Stop&Glo) substrates  
781 were prepared according to the manufacturer's description. The samples were loaded on a  
782 luminometer (EG&G Berthold microplate Luminometer LB 96V Microluminomat plus) and the  
783 substrates were attached to the tubing system of the luminometer. First, 65 µl of LARII was  
784 added to each well of the sample, and the luminescence produced by the firefly luciferase was



Brinkmann et. al

785 measured, then 65  $\mu$ l of Stop&Glo reagent was added and the luminescence produced by the  
786 Renilla luciferase was measured. To assess AhR activity from the luminescence  
787 measurements, we performed the following post-processing steps: First, the luminescence of  
788 non-transfected cells was subtracted from the luminescence of each sample for background  
789 correction. In the next step, we normalized the luciferase luminescence to the renilla  
790 luminescence of the same sample to eliminate differences in the transfection rate and cell  
791 number. Another normalization step to the pcDNA-VP16 transfected cells was performed for  
792 each treatment group to remove AhR-independent effects on the XRE-driven luciferase.

### 793 **Cultivation of primary human EC**

794 Human primary EC(Lonza) were cultured in complete endothelial basal medium (EBM) (Lonza)  
795 supplemented with 1  $\mu$ g/ml hydrocortisone, 12  $\mu$ g/ml bovine brain extract, 50  $\mu$ g/ml gentamicin,  
796 10 ng/ml human epidermal growth factor, and 10% (v/v) fetal calf serum at 37 °C and 5% CO<sub>2</sub>  
797 until the third passage. After detachment with 0.05% (v/v) Trypsin/EDTA (Thermo Scientific),  
798 cells were cultured in 6 cm culture dishes or 6 well culture plates for at least 18 hours before  
799 transfection or treatment.

### 800 **Transient transfection of EC**

801 Cells were transfected as described previously (Haendeler et al., 2002). In brief, EC were  
802 transfected by using SuperFect® Transfection Reagent (Qiagen, Hilden, Germany) according  
803 to the manufacturer's instructions. The overexpression or knockdown of AhR was achieved  
804 after 24 h or 48 h, respectively. The transfection efficiency upon overexpression was  
805 approximately 40%.

### 806 **Scratch wound assay of EC**

807 For investigation of migratory capacity of EC scratch wound assays were performed as  
808 described previously (Ale-Agha et al., 2018). In detail, wounds were set into a cell monolayer  
809 with a cell scraper along a trace line. After the injury, non-attached cells were removed by  
810 gentle washing. The curcumin treatment was performed directly after the wound was set.

Brinkmann et. al

811 Curcumin was dissolved in DMSO and used at the final concentration of 7.5  $\mu$ M. EC migration  
812 was quantified by staining the cells with 5  $\mu$ g/ml 4', 6-diamidino-2-phenylindole (DAPI; Carl  
813 Roth) in PBS for 5 minutes after the cells had been fixed with 4% (v/v) paraformaldehyde for  
814 15 minutes at room temperature. Images were taken using a Zeiss AxioVision Observer D1  
815 fluorescent microscope using a 200-x magnification. Cells migrated into the wound from the  
816 trace line were automatically counted using the particle analysis function of ImageJ 1.52a  
817 (Abràmoff et al., 2004) after overlapping nuclei were separated.

### 818 **Immunostaining of EC**

819 EC were fixed with 4% (v/v) paraformaldehyde for 15 minutes at room temperature. After  
820 permeabilization and blocking in 0.3% (v/v) Triton-X 100 and 3% (v/v) normal goat serum in  
821 PBS, cells were incubated with a rabbit antibody against AhR (1:100, Abcam) or Nrf2 (clone  
822 D1Z9C, 1:100, Cell Signaling Technology) diluted in 1% (v/v) normal goat serum in PBS  
823 overnight at 4 °C. Then, cells were washed with PBS and incubated with an Alexa 594-coupled  
824 goat anti-rabbit IgG (1:500, Invitrogen) for 1 hour at room temperature. For actin staining, cells  
825 were incubated with Alexa Fluor™ 488 Phalloidin (1:70, Invitrogen) for 20 minutes at room  
826 temperature. Nuclei were counterstained with 0.5  $\mu$ g/ml DAPI in PBS for 5 minutes at room  
827 temperature and cells were mounted with ProLong™ Diamond Antifade Mountant (Invitrogen).  
828 Fluorescent images were taken using a Zeiss AxioVision Observer D1 fluorescent microscope,  
829 400x or 200x magnification.

### 830 **qPCR in cells**

831 Total cellular RNA was isolated by combining lysis in TRIzol™ with downstream processing  
832 using the RNeasy Mini Kit (Qiagen) according to the manufacturer's instructions. cDNA  
833 synthesis was performed using the QuantiTect® Reverse Transcription Kit (Qiagen) with 1  
834  $\mu$ g RNA according to the manufacturer's instructions. Relative transcript levels were  
835 determined by pPCR using the 2x SYBR® Green qPCR Master Mix and a Rotor-Gene® Q  
836 thermal cycler (Qiagen). The transcript for the ribosomal protein L32 (*rpl32*) was used as a  
837 reference, relative expression was calculated by the  $\Delta C_T$ -method (Pfaffl, 2001). The following

Brinkmann et. al

838 intron-spanning primer pairs were used: *cyp1a1*: 5'-TCGCTACCTACCCAACCCTT-3', 5'-  
839 TGTGTCAAACCCAGCTCCAA-3'; *ahr*: 5'-CGTGGGTCAGATGCAGTACA-3', 5'-  
840 ACCAGGGTCAAATTGGGCT 3'; *sod2*: 5'-GCCCTGGAACCTCACATCAA-3'; 5'-  
841 AGCAACTCCCCTTTGGGTTC-3'; *rp/32*: 5'-GTGAAGCCCAAGATCGTCAA-3', 5'-  
842 TTGTTGCACATCAGCAGCAC-3'.

## 843 **Mice**

### 844 **Mouse lines and breeding**

845 Female 8-12 week old “Young” and 18 months old (“old”) AHR-deficient B6.129-AHR<sup>tm1Bra/J</sup>  
846 (Schmidt et al., 1996) (referred to here as AHR-KO) mice were bred as heterozygotes in the  
847 IUF’s animal facility. Wild-type littermates were used for control. Mice were bred and kept  
848 under specific pathogen-free conditions on a 12/12-hour light-dark cycle and received  
849 standard chow (ssniff®M-Z, SSNIFF, Soest) *ad libitum*.

### 850 **qPCR in mice**

851 Total RNA was isolated from organ tissues of three WT and three AHR deficient mice with  
852 TriZol®. 400ng of RNA was reverse transcribed using the reverse transcriptase M-MLV  
853 (Promega, USA) and random hexamer primers. Gene expression levels were measured in  
854 duplicates for each mouse tissue on a Rotor-Gene Q (Qiagen, Hilden, Germany), in 15 µl  
855 final volume, containing 7.5 µl Rotor Gene SybrGreen™ (Biorad, Feldkirchen, Germany), 1  
856 µM of each primer, 1.5 µl cDNA and RNase free water. Primer efficiencies were between 90  
857 and 146%. See Table S2 for primer sequences and efficiencies. Expression levels were  
858 calibrated to the expression of RPS6 as a house-keeping gene in the same sample using the  
859  $2^{-\Delta\Delta C_T}$  method (Livak and Schmittgen, 2001).

### 860 ***In situ* analyses**

### 861 **Homology modeling of the CeAHR LBD**

Brinkmann et. al

862 The structural model of *C. elegans* AhR LBD (residues 267–372) was generated by homology  
863 modeling. The X-ray structures of the PASB domains of homologous bHLH-PAS family  
864 members sharing the highest sequence identity (about 20%) with the CeAhR PASB were used  
865 as templates: the circadian locomotor output cycles kaput (CLOCK, PDB: 4F3L), the neuronal  
866 PAS domain-containing protein 3 (NPAS3, PDB: 5SY7), the Hypoxia-inducible factors 2 $\alpha$   
867 (HIF2 $\alpha$ , PDB: 3H82, 4ZP4, 3F1N) and 1 $\alpha$  (HIF1 $\alpha$ , PDB: 4H6J). The model was obtained with  
868 MODELLER (Fiser et al., 2000, Marti-Renom et al., 2000, Sali and Blundell, 1993). The optimal  
869 model was selected from among the 100 generated, based on the best DOPE SCORE (Shen  
870 and Sali, 2006). The quality of the models was evaluated using PROCHECK (Laskowski et al.,  
871 1993). Secondary structures were attributed by DSSPcont (Andersen et al., 2002). The binding  
872 cavity within the modeled LBDs was characterized using the CASTp server (Dundas et al.,  
873 2006). Visualization of the models was accomplished using PYMOL (Schrödinger, 2010).

#### 874 **Statistical analysis**

875 Unless otherwise stated, statistical analyses were performed in GraphPad Prism. For life-  
876 /healthspan assays, statistical analysis was done using OASIS (Han et al., 2016). Statistical  
877 analysis of the microarray data was performed in R.

#### 878 **Boxplots**

879 Boxplots were created in GraphPad Prism and show the median (line), 25-75<sup>th</sup> percentile (box)  
880 and 10-90<sup>th</sup> percentile (whiskers).

Brinkmann et. al

## 881 Acknowledgments

882 Most nematode strains utilized in this work were provided by the Caenorhabditis Genetics  
883 Center, funded by the NIH Office of Research Infrastructure Programs (P40 OD010440). We  
884 thank Thomas Haarmann-Stemann (IUF, Düsseldorf) for providing Cos7 cells, Katrin  
885 Hochrath (IUF) for advice, René Deenen (University of Düsseldorf) for the performance of the  
886 microarray, and Daniel Puchta, and Bo Scherer for expert technical assistance. We further  
887 thank Wormbase and the GENiE network funded by the European Cooperation in Science and  
888 Technology (COST Action BM1408). N.V. acknowledges funding from the Deutsche  
889 Forschungsgemeinschaft (DFG VE366/6-1 and VE366/8-1). V.B. was supported by a Ph.D.  
890 scholarship from the Jürgen Manchot Foundation. J.A. and J.H. acknowledge funding from the  
891 Deutsche Forschungsgemeinschaft: IRTG1902-P1 and IRTG1902-P2.

892

Brinkmann et. al

893 **Author Contributions**

894 **Conceptualization:** N.V.

895 **Formal analysis:** V.B., A.S., N.V.

896 **Funding acquisition:** V.B., N.V.

897 **Investigation:** V.B., L.T., M.R., A.H., J.K, L.L., S.W.

898 **Supervision:** N.V.

899 **Resources:** R.M., X.C., C.E., J.A., J.H., N.V.

900 **Visualization:** V.B.

901 **Writing -original draft-:** V.B., N.V.

902 **Writing -review and editing-:** R.M., A.S., C.E.

Brinkmann et. al

903 **Declaration of interests**

904 The authors declare no competing interests.

905



## 906 References

- 907 AARNIO, V., STORVIK, M., LEHTONEN, M., ASIKAINEN, S., REISNER, K., CALLAWAY, J., RUDGALVYTE,  
908 M., LAKSO, M. & WONG, G. 2010. Fatty acid composition and gene expression profiles are  
909 altered in aryl hydrocarbon receptor-1 mutant *Caenorhabditis elegans*. *Comp Biochem*  
910 *Physiol C Toxicol Pharmacol*, 151, 318-24.
- 911 ABEL, J. & HAARMANN-STEMMANN, T. 2010. An introduction to the molecular basics of aryl  
912 hydrocarbon receptor biology. *Biol Chem*, 391, 1235-48.
- 913 ABNET, C. C., TANGUAY, R. L., HEIDEMAN, W. & PETERSON, R. E. 1999. Transactivation activity of  
914 human, zebrafish, and rainbow trout aryl hydrocarbon receptors expressed in COS-7 cells:  
915 greater insight into species differences in toxic potency of polychlorinated dibenzo-p-dioxin,  
916 dibenzofuran, and biphenyl congeners. *Toxicol Appl Pharmacol*, 159, 41-51.
- 917 ABRÀMOFF, M. D., MAGALHÃES, P. J. & RAM, S. J. 2004. Image Processing with ImageJ. *Biophotonics*  
918 *International*, 11, 36-42.
- 919 AGGARWAL, B. B. & HARIKUMAR, K. B. 2009. Potential therapeutic effects of curcumin, the anti-  
920 inflammatory agent, against neurodegenerative, cardiovascular, pulmonary, metabolic,  
921 autoimmune and neoplastic diseases. *Int J Biochem Cell Biol*, 41, 40-59.
- 922 AHMAD, B., BORANA, M. S. & CHAUDHARY, A. P. 2017. Understanding curcumin-induced modulation  
923 of protein aggregation. *Int J Biol Macromol*, 100, 89-96.
- 924 ALAVEZ, S., VANTIPALLI, M. C., ZUCKER, D. J., KLANG, I. M. & LITHGOW, G. J. 2011. Amyloid-binding  
925 compounds maintain protein homeostasis during ageing and extend lifespan. *Nature*, 472,  
926 226-9.
- 927 ALE-AGHA, N., GOY, C., JAKOBS, P., SPYRIDOPOULOS, I., GONNISSEN, S., DYBALLA-RUKES, N.,  
928 AUFENVENNE, K., VON AMELN, F., ZUREK, M., SPANNBRUCKER, T., ECKERMANN, O., JAKOB,  
929 S., GORRESSEN, S., ABRAMS, M., GRANDOCH, M., FISCHER, J. W., KOHRER, K., DEENEN, R.,  
930 UNFRIED, K., ALTSCHMIED, J. & HAENDELER, J. 2018. CDKN1B/p27 is localized in  
931 mitochondria and improves respiration-dependent processes in the cardiovascular system-  
932 New mode of action for caffeine. *PLoS Biol*, 16, e2004408.
- 933 ANDERSEN, C. A., PALMER, A. G., BRUNAK, S. & ROST, B. 2002. Continuum secondary structure  
934 captures protein flexibility. *Structure*, 10, 175-84.
- 935 ASHIDA, H., FUKUDA, I., YAMASHITA, T. & KANAZAWA, K. 2000. Flavones and flavonols at dietary  
936 levels inhibit a transformation of aryl hydrocarbon receptor induced by dioxin. *FEBS Lett*,  
937 476, 213-7.
- 938 ASHRAFIZADEH, M., AHMADI, Z., MOHAMMADINEJAD, R., FARKHONDEH, T. & SAMARGHANDIAN, S.  
939 2020. Curcumin Activates the Nrf2 Pathway and Induces Cellular Protection Against Oxidative  
940 Injury. *Curr Mol Med*, 20, 116-133.
- 941 BABA, T., SHIMA, Y., OWAKI, A., MIMURA, J., OSHIMA, M., FUJII-KURIYAMA, Y. & MOROHASHI, K. I.  
942 2008. Disruption of aryl hydrocarbon receptor (AhR) induces regression of the seminal vesicle  
943 in aged male mice. *Sex Dev*, 2, 1-11.
- 944 BAZOPOULOU, D., KNOEFLER, D., ZHENG, Y., ULRICH, K., OLESON, B. J., XIE, L., KIM, M., KAUFMANN,  
945 A., LEE, Y. T., DOU, Y., CHEN, Y., QUAN, S. & JAKOB, U. 2019. Developmental ROS  
946 individualizes organismal stress resistance and lifespan. *Nature*, 576, 301-305.
- 947 BELL, D. R. & POLAND, A. 2000. Binding of aryl hydrocarbon receptor (AhR) to AhR-interacting  
948 protein. The role of hsp90. *J Biol Chem*, 275, 36407-14.
- 949 BINDEA, G., MLECNIK, B., HACKL, H., CHAROENTONG, P., TOSOLINI, M., KIRILOVSKY, A., FRIDMAN, W.  
950 H., PAGES, F., TRAJANOSKI, Z. & GALON, J. 2009. ClueGO: a Cytoscape plug-in to decipher  
951 functionally grouped gene ontology and pathway annotation networks. *Bioinformatics*, 25,  
952 1091-3.
- 953 BORS, W., HELLER, W., MICHEL, C. & SARAN, M. 1990. Flavonoids as antioxidants: determination of  
954 radical-scavenging efficiencies. *Methods Enzymol*, 186, 343-55.

Brinkmann et. al

- 955 BRINKMANN, V., ALE-AGHA, N., HAENDELER, J. & VENTURA, N. 2020a. The Aryl Hydrocarbon  
956 Receptor (AhR) in the Aging Process: Another Puzzling Role for This Highly Conserved  
957 Transcription Factor. *Frontiers in Physiology*, 10.
- 958 BRINKMANN, V., SCHIAVI, A., SHAIK, A., PUCHTA, D. R. & VENTURA, N. 2020b. Dietary and  
959 environmental factors have opposite AhR-dependent effects on *C. elegans* healthspan. *Aging*  
960 (*Albany NY*), 12.
- 961 BUTLER, R. A., KELLEY, M. L., POWELL, W. H., HAHN, M. E. & VAN BENEDEEN, R. J. 2001. An aryl  
962 hydrocarbon receptor (AHR) homologue from the soft-shell clam, *Mya arenaria*: evidence  
963 that invertebrate AHR homologues lack 2,3,7,8-tetrachlorodibenzo-p-dioxin and beta-  
964 naphthoflavone binding. *Gene*, 278, 223-34.
- 965 CAESAR, I., JONSON, M., NILSSON, K. P., THOR, S. & HAMMARSTROM, P. 2012. Curcumin promotes A-  
966 beta fibrillation and reduces neurotoxicity in transgenic *Drosophila*. *PLoS One*, 7, e31424.
- 967 CARVALHO, B. S. & IRIZARRY, R. A. 2010. A framework for oligonucleotide microarray preprocessing.  
968 *Bioinformatics*, 26, 2363-7.
- 969 CHIU, H. F., VENKATAKRISHNAN, K. & WANG, C. K. 2020. The role of nutraceuticals as a  
970 complementary therapy against various neurodegenerative diseases: A mini-review. *J Tradit*  
971 *Complement Med*, 10, 434-439.
- 972 CHOI, H., CHUN, Y. S., SHIN, Y. J., YE, S. K., KIM, M. S. & PARK, J. W. 2008. Curcumin attenuates  
973 cytochrome P450 induction in response to 2,3,7,8-tetrachlorodibenzo-p-dioxin by ROS-  
974 dependently degrading AhR and ARNT. *Cancer Sci*, 99, 2518-24.
- 975 CIOLINO, H. P., DASCHNER, P. J., WANG, T. T. & YEH, G. C. 1998. Effect of curcumin on the aryl  
976 hydrocarbon receptor and cytochrome P450 1A1 in MCF-7 human breast carcinoma cells.  
977 *Biochem Pharmacol*, 56, 197-206.
- 978 DENISON, M. S., PANDINI, A., NAGY, S. R., BALDWIN, E. P. & BONATI, L. 2002. Ligand binding and  
979 activation of the Ah receptor. *Chem Biol Interact*, 141, 3-24.
- 980 DETIENNE, G., VAN DE WALLE, P., DE HAES, W., SCHOOF, L. & TEMMERMAN, L. 2016. SKN-1-  
981 independent transcriptional activation of glutathione S-transferase 4 (GST-4) by EGF  
982 signaling. *Worm*, 5, e1230585.
- 983 DIANI-MOORE, S., RAM, P., LI, X., MONDAL, P., YOUN, D. Y., SAUVE, A. A. & RIFKIND, A. B. 2010.  
984 Identification of the aryl hydrocarbon receptor target gene TiPARP as a mediator of  
985 suppression of hepatic gluconeogenesis by 2,3,7,8-tetrachlorodibenzo-p-dioxin and of  
986 nicotinamide as a corrective agent for this effect. *J Biol Chem*, 285, 38801-10.
- 987 DOSTAL, V., ROBERTS, C. M. & LINK, C. D. 2010. Genetic mechanisms of coffee extract protection in a  
988 *Caenorhabditis elegans* model of beta-amyloid peptide toxicity. *Genetics*, 186, 857-66.
- 989 DUNDAS, J., OUYANG, Z., TSENG, J., BINKOWSKI, A., TURPAZ, Y. & LIANG, J. 2006. CASTp: computed  
990 atlas of surface topography of proteins with structural and topographical mapping of  
991 functionally annotated residues. *Nucleic Acids Res*, 34, W116-8.
- 992 ECKERS, A., JAKOB, S., HEISS, C., HAARMANN-STEMMANN, T., GOY, C., BRINKMANN, V., CORTESE-  
993 KROTT, M. M., SANSONE, R., ESSER, C., ALE-AGHA, N., ALTSCHMIED, J., VENTURA, N. &  
994 HAENDELER, J. 2016. The aryl hydrocarbon receptor promotes aging phenotypes across  
995 species. *Sci Rep*, 6, 19618.
- 996 EMA, M., OHE, N., SUZUKI, M., MIMURA, J., SOGAWA, K., IKAWA, S. & FUJII-KURIYAMA, Y. 1994.  
997 Dioxin binding activities of polymorphic forms of mouse and human arylhydrocarbon  
998 receptors. *J Biol Chem*, 269, 27337-43.
- 999 FERNANDEZ-SALGUERO, P., PINEAU, T., HILBERT, D. M., MCPHAIL, T., LEE, S. S., KIMURA, S., NEBERT,  
1000 D. W., RUDIKOFF, S., WARD, J. M. & GONZALEZ, F. J. 1995. Immune system impairment and  
1001 hepatic fibrosis in mice lacking the dioxin-binding Ah receptor. *Science*, 268, 722-6.
- 1002 FERNANDEZ-SALGUERO, P. M., WARD, J. M., SUNDBERG, J. P. & GONZALEZ, F. J. 1997. Lesions of aryl-  
1003 hydrocarbon receptor-deficient mice. *Vet Pathol*, 34, 605-14.
- 1004 FISER, A., DO, R. K. & SALI, A. 2000. Modeling of loops in protein structures. *Protein Sci*, 9, 1753-73.
- 1005 FLEENOR, B. S., SINDLER, A. L., MARVI, N. K., HOWELL, K. L., ZIGLER, M. L., YOSHIZAWA, M. & SEALS,  
1006 D. R. 2013. Curcumin ameliorates arterial dysfunction and oxidative stress with aging. *Exp*  
1007 *Gerontol*, 48, 269-76.

Brinkmann et. al

- 1008 FRACCALVIERI, D., SOSHILOV, A. A., KARCHNER, S. I., FRANKS, D. G., PANDINI, A., BONATI, L., HAHN,  
1009 M. E. & DENISON, M. S. 2013. Comparative analysis of homology models of the AH receptor  
1010 ligand binding domain: verification of structure-function predictions by site-directed  
1011 mutagenesis of a nonfunctional receptor. *Biochemistry*, 52, 714-25.
- 1012 FRITSCHKE, E., SCHAFER, C., CALLES, C., BERNSMANN, T., BERNSHAUSEN, T., WURM, M., HUBENTHAL,  
1013 U., CLINE, J. E., HAJIMIRAGHA, H., SCHROEDER, P., KLOTZ, L. O., RANNUG, A., FURST, P.,  
1014 HANENBERG, H., ABEL, J. & KRUTMANN, J. 2007. Lightening up the UV response by  
1015 identification of the arylhydrocarbon receptor as a cytoplasmatic target for ultraviolet B  
1016 radiation. *Proc Natl Acad Sci U S A*, 104, 8851-6.
- 1017 GAO, D., WU, M., WANG, C., WANG, Y. & ZUO, Z. 2015. Chronic exposure to low benzo[a]pyrene level  
1018 causes neurodegenerative disease-like syndromes in zebrafish (*Danio rerio*). *Aquat Toxicol*,  
1019 167, 200-8.
- 1020 GOUEDARD, C., BAROUKI, R. & MOREL, Y. 2004. Dietary polyphenols increase paraoxonase 1 gene  
1021 expression by an aryl hydrocarbon receptor-dependent mechanism. *Mol Cell Biol*, 24, 5209-  
1022 22.
- 1023 GUTIERREZ-VAZQUEZ, C. & QUINTANA, F. J. 2018. Regulation of the Immune Response by the Aryl  
1024 Hydrocarbon Receptor. *Immunity*, 48, 19-33.
- 1025 GUYOT, E., CHEVALLIER, A., BAROUKI, R. & COUMOUL, X. 2013. The AhR twist: ligand-dependent AhR  
1026 signaling and pharmaco-toxicological implications. *Drug Discov Today*, 18, 479-86.
- 1027 HAENDELER, J., HOFFMANN, J., TISCHLER, V., BERK, B. C., ZEIHNER, A. M. & DIMMELER, S. 2002. Redox  
1028 regulatory and anti-apoptotic functions of thioredoxin depend on S-nitrosylation at cysteine  
1029 69. *Nat Cell Biol*, 4, 743-9.
- 1030 HAHN, M. E. 2002. Aryl hydrocarbon receptors: diversity and evolution. *Chem Biol Interact*, 141, 131-  
1031 60.
- 1032 HAHN, M. E., KARCHNER, S. I., SHAPIRO, M. A. & PERERA, S. A. 1997. Molecular evolution of two  
1033 vertebrate aryl hydrocarbon (dioxin) receptors (AHR1 and AHR2) and the PAS family. *Proc  
1034 Natl Acad Sci U S A*, 94, 13743-8.
- 1035 HAN, S. K., LEE, D., LEE, H., KIM, D., SON, H. G., YANG, J. S., LEE, S. V. & KIM, S. 2016. OASIS 2: online  
1036 application for survival analysis 2 with features for the analysis of maximal lifespan and  
1037 healthspan in aging research. *Oncotarget*, 7, 56147-56152.
- 1038 HANIEH, H. 2014. Toward understanding the role of aryl hydrocarbon receptor in the immune  
1039 system: current progress and future trends. *Biomed Res Int*, 2014, 520763.
- 1040 HECK, D. E., VETRANO, A. M., MARIANO, T. M. & LASKIN, J. D. 2003. UVB light stimulates production  
1041 of reactive oxygen species: unexpected role for catalase. *J Biol Chem*, 278, 22432-6.
- 1042 HERHOLZ, M., CEPEDA, E., BAUMANN, L., KUKAT, A., HERMELING, J., MACIEJ, S., SZCZEPANOWSKA,  
1043 K., PAVLENKO, V., FROMMOLT, P. & TRIFUNOVIC, A. 2019. KLF-1 orchestrates a xenobiotic  
1044 detoxification program essential for longevity of mitochondrial mutants. *Nat Commun*, 10,  
1045 3323.
- 1046 HUANG, S., SHUI, X., HE, Y., XUE, Y., LI, J., LI, G., LEI, W. & CHEN, C. 2015. AhR expression and  
1047 polymorphisms are associated with risk of coronary arterial disease in Chinese population.  
1048 *Sci Rep*, 5, 8022.
- 1049 HUANG, X., POWELL-COFFMAN, J. A. & JIN, Y. 2004. The AHR-1 aryl hydrocarbon receptor and its co-  
1050 factor the AHA-1 aryl hydrocarbon receptor nuclear translocator specify GABAergic neuron  
1051 cell fate in *C. elegans*. *Development*, 131, 819-28.
- 1052 HUBER, W., CAREY, V. J., GENTLEMAN, R., ANDERS, S., CARLSON, M., CARVALHO, B. S., BRAVO, H. C.,  
1053 DAVIS, S., GATTO, L., GIRKE, T., GOTTARDO, R., HAHNE, F., HANSEN, K. D., IRIZARRY, R. A.,  
1054 LAWRENCE, M., LOVE, M. I., MACDONALD, J., OBENCHAIN, V., OLES, A. K., PAGES, H., REYES,  
1055 A., SHANNON, P., SMYTH, G. K., TENENBAUM, D., WALDRON, L. & MORGAN, M. 2015.  
1056 Orchestrating high-throughput genomic analysis with Bioconductor. *Nat Methods*, 12, 115-  
1057 21.
- 1058 JEUKEN, A., KESER, B. J., KHAN, E., BROUWER, A., KOEMAN, J. & DENISON, M. S. 2003. Activation of  
1059 the Ah receptor by extracts of dietary herbal supplements, vegetables, and fruits. *J Agric  
1060 Food Chem*, 51, 5478-87.

Brinkmann et. al

- 1061 JONES, L. M., RAYSON, S. J., FLEMMING, A. J. & URWIN, P. E. 2013. Adaptive and specialised  
1062 transcriptional responses to xenobiotic stress in *Caenorhabditis elegans* are regulated by  
1063 nuclear hormone receptors. *PLoS One*, 8, e69956.
- 1064 KAHN, N. W., REA, S. L., MOYLE, S., KELL, A. & JOHNSON, T. E. 2008. Proteasomal dysfunction  
1065 activates the transcription factor SKN-1 and produces a selective oxidative-stress response in  
1066 *Caenorhabditis elegans*. *Biochem J*, 409, 205-13.
- 1067 KAMATH, R. S. & AHRINGER, J. 2003. Genome-wide RNAi screening in *Caenorhabditis elegans*.  
1068 *Methods*, 30, 313-21.
- 1069 KAUFFMANN, A., GENTLEMAN, R. & HUBER, W. 2009. arrayQualityMetrics--a bioconductor package  
1070 for quality assessment of microarray data. *Bioinformatics*, 25, 415-6.
- 1071 KOHLE, C. & BOCK, K. W. 2007. Coordinate regulation of Phase I and II xenobiotic metabolisms by the  
1072 Ah receptor and Nrf2. *Biochem Pharmacol*, 73, 1853-62.
- 1073 KUBLI, S. P., BASSI, C., ROUX, C., WAKEHAM, A., GOBL, C., ZHOU, W., JAFARI, S. M., SNOW, B., JONES,  
1074 L., PALOMERO, L., THU, K. L., CASSETTA, L., SOONG, D., BERGER, T., RAMACHANDRAN, P.,  
1075 BANIASADI, S. P., DUNCAN, G., LINDZEN, M., YARDEN, Y., HERRANZ, C., LAZARO, C., CHU, M.  
1076 F., HAIGHT, J., TINTO, P., SILVESTER, J., CESCONE, D. W., PETIT, A., PETERSSON, S., POLLARD,  
1077 J. W., MAK, T. W., PUJANA, M. A., CAPPELLO, P. & GORRINI, C. 2019. AhR controls redox  
1078 homeostasis and shapes the tumor microenvironment in BRCA1-associated breast cancer.  
1079 *Proc Natl Acad Sci U S A*, 116, 3604-3613.
- 1080 LAHTEENVUO, J. & ROSENZWEIG, A. 2012. Effects of aging on angiogenesis. *Circ Res*, 110, 1252-64.
- 1081 LASKOWSKI, R., MACARTHUR, M., MOSS, D. & THORNTON, J. 1993. PROCHECK: a program to check  
1082 the stereochemical quality of protein structures. *J Appl Crystallogr* 283-291.
- 1083 LEMIRE, B. D., BEHRENDT, M., DECORBY, A. & GASKOVA, D. 2009. *C. elegans* longevity pathways  
1084 converge to decrease mitochondrial membrane potential. *Mech Ageing Dev*, 130, 461-5.
- 1085 LI, W., SUN, K., HU, F., CHEN, L., ZHANG, X., WANG, F. & YAN, B. 2021. Protective effects of natural  
1086 compounds against oxidative stress in ischemic diseases and cancers via activating the Nrf2  
1087 signaling pathway: A mini review. *J Biochem Mol Toxicol*, 35, e22658.
- 1088 LIAO, V. H., YU, C. W., CHU, Y. J., LI, W. H., HSIEH, Y. C. & WANG, T. T. 2011. Curcumin-mediated  
1089 lifespan extension in *Caenorhabditis elegans*. *Mech Ageing Dev*, 132, 480-7.
- 1090 LIM, G. P., CHU, T., YANG, F., BEECH, W., FRAUTSCHY, S. A. & COLE, G. M. 2001. The curry spice  
1091 curcumin reduces oxidative damage and amyloid pathology in an Alzheimer transgenic  
1092 mouse. *J Neurosci*, 21, 8370-7.
- 1093 LIU, Y., SAMUEL, B. S., BREEN, P. C. & RUVKUN, G. 2014. *Caenorhabditis elegans* pathways that  
1094 surveil and defend mitochondria. *Nature*, 508, 406-10.
- 1095 LIVAK, K. J. & SCHMITTGEN, T. D. 2001. Analysis of relative gene expression data using real-time  
1096 quantitative PCR and the 2<sup>-Delta Delta C(T)</sup> Method. *Methods*, 25, 402-8.
- 1097 MAGLIONI, S., ARSALAN, N., HAMACHER, A., AFSHAR, S., SCHIAVI, A., BELLER, M. & VENTURA, N.  
1098 2022. High-Content *C. elegans* Screen Identifies Natural Compounds Impacting Mitochondria-  
1099 Lipid Homeostasis and Promoting Healthspan. *Cells*, 11, 100.
- 1100 MANDAL, P. K. 2005. Dioxin: a review of its environmental effects and its aryl hydrocarbon receptor  
1101 biology. *J Comp Physiol B*, 175, 221-30.
- 1102 MAO, K., JI, F., BREEN, P., SEWELL, A., HAN, M., SADREYEV, R. & RUVKUN, G. 2019. Mitochondrial  
1103 Dysfunction in *C. elegans* Activates Mitochondrial Relocalization and Nuclear Hormone  
1104 Receptor-Dependent Detoxification Genes. *Cell Metab*, 29, 1182-1191 e4.
- 1105 MARINKOVIC, N., PASALIC, D., FERENCAK, G., GRŠKOVIC, B. & STAVLJENIC RUKAVINA, A. 2010.  
1106 Dioxins and human toxicity. *Arh Hig Rada Toksikol*, 61, 445-53.
- 1107 MARTI-RENO, M. A., STUART, A. C., FISER, A., SANCHEZ, R., MELO, F. & SALI, A. 2000. Comparative  
1108 protein structure modeling of genes and genomes. *Annu Rev Biophys Biomol Struct*, 29, 291-  
1109 325.
- 1110 MINAMI, K., NAKAJIMA, M., FUJIKI, Y., KATOH, M., GONZALEZ, F. J. & YOKOI, T. 2008. Regulation of  
1111 insulin-like growth factor binding protein-1 and lipoprotein lipase by the aryl hydrocarbon  
1112 receptor. *J Toxicol Sci*, 33, 405-13.



Brinkmann et. al

- 1113 MOHAMMADI-BARDBORI, A., AKBARIZADEH, A. R., DELJU, F. & RANNUG, A. 2016. Chromatin  
1114 remodeling by curcumin alters endogenous aryl hydrocarbon receptor signaling. *Chem Biol*  
1115 *Interact*, 252, 19-27.
- 1116 MOREL, Y. & BAROUKI, R. 1998. Down-regulation of cytochrome P450 1A1 gene promoter by  
1117 oxidative stress. Critical contribution of nuclear factor 1. *J Biol Chem*, 273, 26969-76.
- 1118 MORLEY, J. F., BRIGNULL, H. R., WEYERS, J. J. & MORIMOTO, R. I. 2002. The threshold for  
1119 polyglutamine-expansion protein aggregation and cellular toxicity is dynamic and influenced  
1120 by aging in *Caenorhabditis elegans*. *Proc Natl Acad Sci U S A*, 99, 10417-22.
- 1121 MOTTO, I., BORDOGNA, A., SOSHILOV, A. A., DENISON, M. S. & BONATI, L. 2011. New aryl  
1122 hydrocarbon receptor homology model targeted to improve docking reliability. *J Chem Inf*  
1123 *Model*, 51, 2868-81.
- 1124 NISHIUMI, S., YOSHIDA, K. & ASHIDA, H. 2007. Curcumin suppresses the transformation of an aryl  
1125 hydrocarbon receptor through its phosphorylation. *Arch Biochem Biophys*, 466, 267-73.
- 1126 OKEY, A. B., DUBE, A. W. & VELLA, L. M. 1984. Binding of benzo(a)pyrene and dibenz(a,h)anthracene  
1127 to the Ah receptor in mouse and rat hepatic cytosols. *Cancer Res*, 44, 1426-32.
- 1128 OLIVER, J. M., STONER, L., ROWLANDS, D. S., CALDWELL, A. R., SANDERS, E., KREUTZER, A., MITCHELL,  
1129 J. B., PURPURA, M. & JAGER, R. 2016. Novel Form of Curcumin Improves Endothelial Function  
1130 in Young, Healthy Individuals: A Double-Blind Placebo Controlled Study. *J Nutr Metab*, 2016,  
1131 1089653.
- 1132 PECKER, M. S., IM, W. B., SONN, J. K. & LEE, C. O. 1986. Effect of norepinephrine and cyclic AMP on  
1133 intracellular sodium ion activity and contractile force in canine cardiac Purkinje fibers. *Circ*  
1134 *Res*, 59, 390-7.
- 1135 PFAFFL, M. W. 2001. A new mathematical model for relative quantification in real-time RT-PCR.  
1136 *Nucleic Acids Res*, 29, e45.
- 1137 POLAND, A. & GLOVER, E. 1975. Genetic Expression of Aryl Hydrocarbon Hydroxylase by 2,3,7,8-  
1138 Tetrachlorodibenzo-*p*-dioxin: Evidence for a Receptor Mutation in Genetically  
1139 Non-responsive Mice. *Molecular Pharmacology*, 11, 389-398.
- 1140 POLAND, A., GLOVER, E. & KENDE, A. S. 1976. Stereospecific, high affinity binding of 2,3,7,8-  
1141 tetrachlorodibenzo-*p*-dioxin by hepatic cytosol. Evidence that the binding species is receptor  
1142 for induction of aryl hydrocarbon hydroxylase. *J Biol Chem*, 251, 4936-46.
- 1143 POWELL-COFFMAN, J. A., BRADFIELD, C. A. & WOOD, W. B. 1998. *Caenorhabditis elegans* orthologs  
1144 of the aryl hydrocarbon receptor and its heterodimerization partner the aryl hydrocarbon  
1145 receptor nuclear translocator. *Proc Natl Acad Sci U S A*, 95, 2844-9.
- 1146 PREIBISCH, S., SAALFELD, S. & TOMANCAK, P. 2009. Globally optimal stitching of tiled 3D microscopic  
1147 image acquisitions. *Bioinformatics*, 25, 1463-5.
- 1148 QIN, H. & POWELL-COFFMAN, J. A. 2004. The *Caenorhabditis elegans* aryl hydrocarbon receptor,  
1149 AHR-1, regulates neuronal development. *Dev Biol*, 270, 64-75.
- 1150 QIN, H., ZHAI, Z. & POWELL-COFFMAN, J. A. 2006. The *Caenorhabditis elegans* AHR-1 transcription  
1151 complex controls expression of soluble guanylate cyclase genes in the URX neurons and  
1152 regulates aggregation behavior. *Dev Biol*, 298, 606-15.
- 1153 REGITZ, C., FITZENBERGER, E., MAHN, F. L., DUSSLING, L. M. & WENZEL, U. 2016. Resveratrol reduces  
1154 amyloid-beta (Aβ<sub>1-42</sub>)-induced paralysis through targeting proteostasis in an  
1155 Alzheimer model of *Caenorhabditis elegans*. *Eur J Nutr*, 55, 741-747.
- 1156 RINALDI, A. L., MORSE, M. A., FIELDS, H. W., ROTHAS, D. A., PEI, P., RODRIGO, K. A., RENNER, R. J. &  
1157 MALLERY, S. R. 2002. Curcumin activates the aryl hydrocarbon receptor yet significantly  
1158 inhibits (-)-benzo(a)pyrene-7R-trans-7,8-dihydrodiol bioactivation in oral squamous cell  
1159 carcinoma cells and oral mucosa. *Cancer Res*, 62, 5451-6.
- 1160 RISTOW, M. & SCHMEISSER, K. 2014. Mitohormesis: Promoting Health and Lifespan by Increased  
1161 Levels of Reactive Oxygen Species (ROS). *Dose Response*, 12, 288-341.
- 1162 RITCHIE, M. E., PHIPSON, B., WU, D., HU, Y., LAW, C. W., SHI, W. & SMYTH, G. K. 2015. limma powers  
1163 differential expression analyses for RNA-sequencing and microarray studies. *Nucleic Acids*  
1164 *Res*, 43, e47.

Brinkmann et. al

- 1165 SAKAKIBARA, H., NAKAGAWA, S., WAKAMEDA, H., NAKAGIRI, Y., KAMATA, K., DAS, S. K., TSUJI, T. &  
1166 KANAZAWA, K. 2005. Effects of Japanese kelp (kombu) on life span of benzo[a]pyrene-fed  
1167 mice. *J Nutr Sci Vitaminol (Tokyo)*, 51, 369-73.
- 1168 SALI, A. & BLUNDELL, T. L. 1993. Comparative protein modelling by satisfaction of spatial restraints. *J*  
1169 *Mol Biol*, 234, 779-815.
- 1170 SANDOVAL-ACUNA, C., FERREIRA, J. & SPEISKY, H. 2014. Polyphenols and mitochondria: an update on  
1171 their increasingly emerging ROS-scavenging independent actions. *Arch Biochem Biophys*, 559,  
1172 75-90.
- 1173 SCHINDELIN, J., ARGANDA-CARRERAS, I., FRISE, E., KAYNIG, V., LONGAIR, M., PIETZSCH, T., PREIBISCH,  
1174 S., RUEDEN, C., SAALFELD, S., SCHMID, B., TINEVEZ, J. Y., WHITE, D. J., HARTENSTEIN, V.,  
1175 ELICEIRI, K., TOMANCAK, P. & CARDONA, A. 2012. Fiji: an open-source platform for biological-  
1176 image analysis. *Nat Methods*, 9, 676-82.
- 1177 SCHMIDT, J. V., SU, G. H., REDDY, J. K., SIMON, M. C. & BRADFIELD, C. A. 1996. Characterization of a  
1178 murine Ahr null allele: involvement of the Ah receptor in hepatic growth and development.  
1179 *Proc Natl Acad Sci U S A*, 93, 6731-6.
- 1180 SCHRÖDINGER, L. 2010. The PyMOL Molecular Graphics System. Version 1.3r1 ed.
- 1181 SHAHAM, S. 2006. WormBook: Methods in cell biology. *WormBook*.
- 1182 SHANNON, P., MARKIEL, A., OZIER, O., BALIGA, N. S., WANG, J. T., RAMAGE, D., AMIN, N.,  
1183 SCHWIKOWSKI, B. & IDEKER, T. 2003. Cytoscape: a software environment for integrated  
1184 models of biomolecular interaction networks. *Genome Res*, 13, 2498-504.
- 1185 SHEN, M. Y. & SALI, A. 2006. Statistical potential for assessment and prediction of protein structures.  
1186 *Protein Sci*, 15, 2507-24.
- 1187 SHI, H., LIU, J. & GAO, H. 2021. Benzo(alpha)pyrene induces oxidative stress and inflammation in  
1188 human vascular endothelial cells through AhR and NF-kappaB pathways. *Microvasc Res*, 137,  
1189 104179.
- 1190 SMIRNOVA, A., WINCENT, E., VIKSTROM BERGANDER, L., ALSBERG, T., BERGMAN, J., RANNUG, A. &  
1191 RANNUG, U. 2016. Evidence for New Light-Independent Pathways for Generation of the  
1192 Endogenous Aryl Hydrocarbon Receptor Agonist FICZ. *Chem Res Toxicol*, 29, 75-86.
- 1193 SMITH, C. J., O'BRIEN, T., CHATZIGEORGIOU, M., SPENCER, W. C., FEINGOLD-LINK, E., HUSSON, S. J.,  
1194 HORI, S., MITANI, S., GOTTSCHALK, A., SCHAFFER, W. R. & MILLER, D. M., 3RD 2013. Sensory  
1195 Neuron Fates Are Distinguished by a Transcriptional Switch that Regulates Dendrite Branch  
1196 Stabilization. *Neuron*, 79, 266-80.
- 1197 SOMMER, C., STRÄHLE, C., KÖTHE, U. & HAMPRECHT, F. A. 2011. Ilastik: Interactive Learning and  
1198 Segmentation Toolkit. *Eighth IEEE International Symposium on Biomedical Imaging (ISBI)*.  
1199 *Proceedings*.
- 1200 SPYRIDOPOULOS, I., FICHTLSCHERER, S., POPP, R., TOENNES, S. W., FISSLTHALER, B., TREPELS, T.,  
1201 ZERNECKE, A., LIEHN, E. A., WEBER, C., ZEIHNER, A. M., DIMMELER, S. & HAENDELER, J. 2008.  
1202 Caffeine enhances endothelial repair by an AMPK-dependent mechanism. *Arterioscler*  
1203 *Thromb Vasc Biol*, 28, 1967-74.
- 1204 TIMMONS, L. & FIRE, A. 1998. Specific interference by ingested dsRNA. *Nature*, 395, 854.
- 1205 VAN HAM, T. J., THIJSSSEN, K. L., BREITLING, R., HOFSTRA, R. M., PLASTERK, R. H. & NOLLEN, E. A.  
1206 2008. C. elegans model identifies genetic modifiers of alpha-synuclein inclusion formation  
1207 during aging. *PLoS Genet*, 4, e1000027.
- 1208 VONDRACEK, J., UMANNOVA, L. & MACHALA, M. 2011. Interactions of the aryl hydrocarbon receptor  
1209 with inflammatory mediators: beyond CYP1A regulation. *Curr Drug Metab*, 12, 89-103.
- 1210 WANG, X., LI, S., LIU, L., JIAN, Z., CUI, T., YANG, Y., GUO, S., YI, X., WANG, G., LI, C., GAO, T. & LI, K.  
1211 2019. Role of the aryl hydrocarbon receptor signaling pathway in promoting mitochondrial  
1212 biogenesis against oxidative damage in human melanocytes. *J Dermatol Sci*, 96, 33-41.
- 1213 WILLIAMS, E. G., MOUCHIROUD, L., FROCHAUX, M., PANDEY, A., ANDREUX, P. A., DEPLANCKE, B. &  
1214 AUWERX, J. 2014. An evolutionarily conserved role for the aryl hydrocarbon receptor in the  
1215 regulation of movement. *PLoS Genet*, 10, e1004673.
- 1216 WOOD, J. G., ROGINA, B., LAVU, S., HOWITZ, K., HELFAND, S. L., TATAR, M. & SINCLAIR, D. 2004.  
1217 Sirtuin activators mimic caloric restriction and delay ageing in metazoans. *Nature*, 430, 686-9.

Brinkmann et. al

- 1218 WU, H., HUANG, C., TAKI, F. A., ZHANG, Y., DOBBINS, D. L., LI, L., YAN, H. & PAN, X. 2015. Benzo-  
1219 alpha-pyrene induced oxidative stress in *Caenorhabditis elegans* and the potential  
1220 involvements of microRNA. *Chemosphere*, 139, 496-503.
- 1221 XUE, Z., LI, D., YU, W., ZHANG, Q., HOU, X., HE, Y. & KOU, X. 2017. Mechanisms and therapeutic  
1222 prospects of polyphenols as modulators of the aryl hydrocarbon receptor. *Food Funct*, 8,  
1223 1414-1437.
- 1224 YANG, J. S., NAM, H. J., SEO, M., HAN, S. K., CHOI, Y., NAM, H. G., LEE, S. J. & KIM, S. 2011. OASIS:  
1225 online application for the survival analysis of lifespan assays performed in aging research.  
1226 *PLoS One*, 6, e23525.
- 1227 YI, T., WANG, J., ZHU, K., TANG, Y., HUANG, S., SHUI, X., DING, Y., CHEN, C. & LEI, W. 2018. Aryl  
1228 Hydrocarbon Receptor: A New Player of Pathogenesis and Therapy in Cardiovascular  
1229 Diseases. *Biomed Res Int*, 2018, 6058784.
- 1230 ZHANG, L., MA, J., TAKEUCHI, M., USUI, Y., HATTORI, T., OKUNUKI, Y., YAMAKAWA, N., KEZUKA, T.,  
1231 KURODA, M. & GOTO, H. 2010. Suppression of experimental autoimmune uveoretinitis by  
1232 inducing differentiation of regulatory T cells via activation of aryl hydrocarbon receptor.  
1233 *Invest Ophthalmol Vis Sci*, 51, 2109-17.
- 1234 ZHANG, S., QIN, C. & SAFE, S. H. 2003. Flavonoids as aryl hydrocarbon receptor agonists/antagonists:  
1235 effects of structure and cell context. *Environ Health Perspect*, 111, 1877-82.
- 1236
